1 **Dynamics of the bacterial community associated with *Phaeodactylum***  
2 ***tricornutum* cultures**

3 **Fiona Wanjiku Moejes<sup>1,2</sup>, Ovidiu Popa<sup>2,3</sup>, Antonella Succurro<sup>2,3</sup>, Julie Maguire<sup>1</sup>, Oliver Ebenhöh<sup>2,3</sup>**

4

5 <sup>1</sup>**Daithi O’Murchu Marine Research Station, Bantry, Co. Cork, Ireland**

6 <sup>2</sup>**Institute for Quantitative and Theoretical Biology, Heinrich-Heine University, Düsseldorf, Germany**

7 <sup>3</sup>**CEPLAS (Cluster of Excellence on Plant Sciences), Heinrich-Heine University, Düsseldorf, Germany**

8

9 **Correspondence:**

10 Jun. Prof. Oliver Ebenhöh

11 Institute for Quantitative and Theoretical Biology

12 Heinrich-Heine University

13 Düsseldorf, GERMANY

14 Tel.: +49 211 81 029 22

15 Fax: +49 211 81-15563

16 E-mail: [oliver.ebenhoeh@hhu.de](mailto:oliver.ebenhoeh@hhu.de)

17

18 **Running title:**

19 Bacterial community profile of diatom cultures

20

## 21 **Abstract**

22 The pennate diatom *Phaeodactylum tricornutum* is a model organism able to synthesise industrially-  
23 relevant molecules. Large-scale monocultures are prone to bio-contamination, however, little is  
24 known about the identity of the invading organisms. To gain insight into the bacterial community  
25 associated with diatoms, we translated the complexity of a natural system into reproducible  
26 experiments where we investigated the microbiome of *P. tricornutum* cultures. The results revealed a  
27 dynamic bacterial community that changed over time and in differing media conditions. We propose  
28 a network of putative interactions between *P. tricornutum* and the main bacterial factions, which is  
29 translated into a set of ordinary differential equations constituting a computational dynamic model.  
30 The proposed mathematical model is able to capture the population dynamics, further supporting the  
31 hypothesised interactions. The interdisciplinary approach implemented provides a framework for  
32 understanding the dynamics of diatom-associated microbial communities, and provides a foundation  
33 for further systematic investigations of host-microbe interactions.

## 34 **Introduction**

35 *Phaeodactylum tricornutum* is a diatom first described by Bohlin in 1897 when he found it in samples  
36 collected off the coast of Plymouth, United Kingdom. Diatoms belong to the Phylum *Heterokontophyta*  
37 and the Class *Bacillariophyceae* (Dangeard, 1933). They are the result of a secondary endosymbiotic  
38 event that took place around one billion years ago between a red alga (Rhodophyta) and a  
39 heterotrophic eukaryote (Bhattacharya *et al.*, 2007). Unlike most diatoms, which have the distinct  
40 ability to precipitate soluble silicic acid to form a silica cell wall, *P. tricornutum* has a poorly silicified  
41 cell wall and therefore does not have an obligate requirement for silicic acid (Montsant *et al.*, 2005;  
42 Martino *et al.*, 2007). *P. tricornutum* is found in coastal regions such as rock pools and estuaries where  
43 aquatic environmental parameters (salinity, temperature) vary greatly as a consequence of tidal  
44 changes and solar irradiation (Martino *et al.*, 2011). Its habitual characteristics, peculiar ability to form

45 oval, fusiform, and triradiate cells, as well as its poorly silicified cell wall, have triggered a tremendous  
46 increase in scientific research on *P. tricornutum*. The genome sequencing of *P. tricornutum* was  
47 completed in 2008, and the subsequent generation of expressed sequence tag (ESTs) databases make  
48 *P. tricornutum* an excellent model organism (Montsant *et al.*, 2005; Martino *et al.*, 2007; Bowler *et al.*,  
49 2008).

50 Driven by photosynthesis, *P. tricornutum* is able to synthesise a number of commercially relevant  
51 molecules, applicable to various industries. In aquaculture, *P. tricornutum* is used as feed for bivalve,  
52 echinoderm, crustacean and fish hatcheries (Ryther and Goldman, 1975; Tredici *et al.*, 2009). On  
53 average, 18% of the *P. tricornutum* biomass are lipids, making it a potential candidate for biofuel  
54 production (Kates and Volcani, 1966; Reboloso-Fuentes *et al.*, 2001). Furthermore, *P. tricornutum* has  
55 the ability to produce the poly-unsaturated fatty acids (PUFA) eicosapentaenoic acid (EPA; 20:5n-3)  
56 and docosahexaenoic acid (DHA; 22:6n-3) in high proportions of the total fatty acid content (Siron *et*  
57 *al.*, 1989; Reboloso-Fuentes *et al.*, 2001; Fajardo *et al.*, 2007). Marine-derived EPA and DHA,  
58 colloquially known as omega-3 PUFAs, are important in human nutrition with a vast number of health  
59 benefits (Yashodhara *et al.*, 2009). *P. tricornutum* is therefore an ideal source of omega-3 PUFAs for  
60 the pharma- and nutraceutical industries.

61 To fully exploit the industrial potential of *P. tricornutum* derived products, substantial amounts of  
62 microalgal biomass are required, preferably with low production costs. This is achieved by  
63 implementation of large-scale cultivation methods such as open raceway ponds and various types of  
64 photobioreactors. Microalgal cultivation methods rely on keeping monocultures of the desired  
65 species, especially if the final product is a bioactive molecule for human consumption (Mata *et al.*,  
66 2010). Photobioreactors (PBRs) are closed systems that allow for the production of monoseptic  
67 cultures, fully isolated from potential contamination if cultivation protocols are followed correctly  
68 (Grima and Fernández, 1999). However, high operational costs of PBRs would increase production  
69 costs. The other option is open raceway ponds, which are simple open-air cultivation systems that  
70 have been in use since the 1950s (Chisti, 2007). They are highly susceptible to contamination, and

71 unless the desired species is a halophile or thermophile (Parmar *et al.*, 2011), it is hard to maintain  
72 monocultures. Irrespective of the cultivation method, the establishment of unwanted organisms such  
73 as amoeba, ciliates, rotifers, bacteria, viruses, and other photosynthetic organisms in microalgal  
74 cultures, is a serious obstacle for large-scale microalgae cultivation (Day *et al.*, 2012; Wang *et al.*,  
75 2013). Although much research is carried out in the field of microalgal culture upscaling, very little is  
76 known about the identity and characteristics of these invading organisms, responsible for microalgal  
77 culture ‘crashes’ which lead to loss of biomass, and therefore, loss of revenue.

78 The establishment of non-target organisms in microalgal cultures should not come as a surprise.  
79 Microalgae are not found in monoculture in nature and imposing such an environment is  
80 counterintuitive leading to unstable cultures. Rather than looking at these organisms as contaminants,  
81 understanding them could allow for the exploration of ‘synthetic ecology’ as a novel scaling up  
82 technique, a concept proposed by Kazamia *et al.*, 2012. The cornerstone of synthetic ecology is the  
83 Competitive Exclusion Principle, or Gause’s Law, which states ‘as a result of competition two species  
84 scarcely ever occupy similar niches, but displace each other in such a manner that each takes  
85 possession of certain peculiar kinds of food and modes of life in which it has an advantage over its  
86 competitor’ (Gause, 1934; Hardin, 1960). By ‘synthesising’ a community of organisms that fills every  
87 niche in the ecosystem (i.e. the microalgal culture) supporting the growth of the desired microalgae,  
88 we prevent the establishment of other, potentially harmful organisms in the culture, and optimise the  
89 utilisation of nutrients (Kazamia *et al.*, 2012).

90 In order for synthetic ecology to be a legitimate contender as a novel scaling up technique, greater  
91 understanding of species-specific interactions is required. Bacteria are present in all of the Earths’  
92 biomes (Dykhuisen, 1998), and insight into the microorganisms (plankton) inhabiting our oceans was  
93 greatly improved by the three-year study aboard the schooner *Tara*. In May 2015, Sunagawa *et al.*  
94 published the metagenomics data from 243 samples collected from 68 unique locations during the  
95 *Tara* expedition. The data showed that 58.8% of the sequences belonged to bacteria, even though  
96 bacterial densities ( $10^5$  to  $10^6$  per gram of seawater) in our oceans are orders of magnitudes less than

97 those found in sediments ( $10^8$  cells per gram), humans ( $10^{14}$  cells per gram), or soil ( $10^9$  cells per gram)  
98 (Whitman *et al.*, 1998; Amin *et al.*, 2012). The data generated by the *Tara* project shows the sheer  
99 amplitude of genetic material belonging to bacteria, coupled with their co-existence with diatoms for  
100 more than 200 million years (Amin *et al.*, 2012), fuelled our interest in the microbiome of diatom  
101 cultures. Furthermore, in 1958, Provasoli suggested that bacteria can enhance the growth of algae  
102 (Provasoli, 1958). In the subsequent decades, species-specific studies have further corroborated his  
103 initial idea (Delucca and Mccracken, 1977; Suminto and Hirayama, 1997). Furthermore, Bruckner *et*  
104 *al.* showed an increase in growth of *P. tricornutum* when co-cultured with an Alphaproteobacterium  
105 strain as well as when cultured in the spent media of the bacteria (Bruckner *et al.*, 2011). A recent  
106 study conducted by Amin *et al.* shows a species-specific interaction between a coastal diatom, *Pseudo-*  
107 *nitzschia multiseriis*, and a bacterial *Sulfitobacter* species (SA11), where the bacteria was shown to  
108 promote diatom cell division via secretion indole-3-acetic acid IAA, synthesised by the bacterium using  
109 diatom secreted and endogenous tryptophan. The IAA and tryptophan act as signalling molecules in  
110 this intricate diatom-bacteria relationship (Amin *et al.*, 2015).

111 With respect to the application in industry, the bacteria act as probiotics for the microalgae culture,  
112 just as bacterial probiotics have been successfully implemented in human diet by the pharma- and  
113 nutraceutical industries (Parvez and Malik, 2006), poultry industries (Kabir, 2009), and aquaculture  
114 industries (Qi *et al.*, 2009), to name a few. By identifying the bacterial community in non-axenic *P.*  
115 *tricornutum* cultures we can start to identify and characterise those that may have a beneficial role in  
116 the cultures. Subsequently, a suitable candidate to fill a certain niche in the hypothetical synthetic  
117 ecosystem could be chosen.

## 118 **Results**

119 In order to translate the complexity of a natural system into a reproducible, systematic experimental  
120 approach, batch cultures of *Phaeodactylum tricornutum* (CCAP 1052/1B) were cultivated in two media  
121 conditions; (1) complete F/2 medium with the addition of sodium metasilicate as the source of silicon,

122 and (2) minimal media with a source of nitrogen ( $\text{NaNO}_3$ ) and phosphorus ( $\text{NaH}_2\text{PO}_4 \cdot 2\text{H}_2\text{O}$ ) at the same  
123 concentration as in the F/2 medium recipe. Samples were taken at different stages of growth and  
124 subsequent barcoded 16S-V6-Next Generation Sequencing carried out. After the implementation of a  
125 stringent bioinformatics approach, the identity and abundance of the bacteria present in *P.*  
126 *tricornutum* cultures was revealed. The in the temporal evolution of the relative abundances of  
127 bacteria were used to infer a network of interactions between the diatom and the four dominant  
128 bacteria families, which was then translated into a mathematical model reproducing the community  
129 dynamics.

### 130 **Characteristics of *Phaeodactylum tricornutum* culture growth**

131 The media composition was shown to have a significant effect on the growth characteristics of *P.*  
132 *tricornutum*. A significant difference ( $p=0.042$ , unpaired Wilcoxon signed rank) in the maximal cell  
133 density when *P. tricornutum* is cultivated in complete ( $9.3 \times 10^6$  cells/mL) or minimal media ( $11.2 \times 10^6$   
134 cells/mL). The growth rates during the exponential phase in both cultures were  $\mu_{\text{complete}} = 0.43 \pm 0.07$   
135  $\text{d}^{-1}$  and  $\mu_{\text{minimal}} = 0.51 \pm 0.04 \text{ d}^{-1}$  respectively. In contrast, the death rates when the cultures ‘crash’ are  
136  $\delta_{\text{complete}} = 0.09 \pm 0.02 \text{ d}^{-1}$  and  $\delta_{\text{minimal}} = 0.08 \pm 0.04 \text{ d}^{-1}$  respectively.

### 137 **Bacterial community profile of *Phaeodactylum tricornutum* cultures**

138 In order to identify the bacteria present in the *P. tricornutum* cultures, the Ion Torrent™ barcoded  
139 Next Generation Sequencing protocol was used to sequence the bacterial gDNA (Quail *et al.*, 2012;  
140 Grada and Weinbrecht, 2013). The subsequent 16S rRNA gene sequences were clustered to defined  
141 Operational Taxonomic Units (OTUs) using a threshold of  $\geq 97\%$  sequence identity, most of which could  
142 be assigned to the genera level (Supplementary Figure S2). Of the 9727 OTUs identified, 8109  
143 corresponded to known sequences in the SILVA database (v.118) (Quast *et al.*, 2013). The OTU  
144 abundance at the phylum level showed that 99.97% of all OTUs belonged to Proteobacteria,  
145 Bacteroidetes, Actinobacteria and Firmicutes (Figure 1). A comparison of the number of individual

146 reads to the number of unique OTUs showed that the high number of reads per phyla is not the result  
147 of a single OTU (Supplementary Figure S3). OTUs with hits to known 16S *P. tricornutum* chloroplast  
148 sequences were discarded.

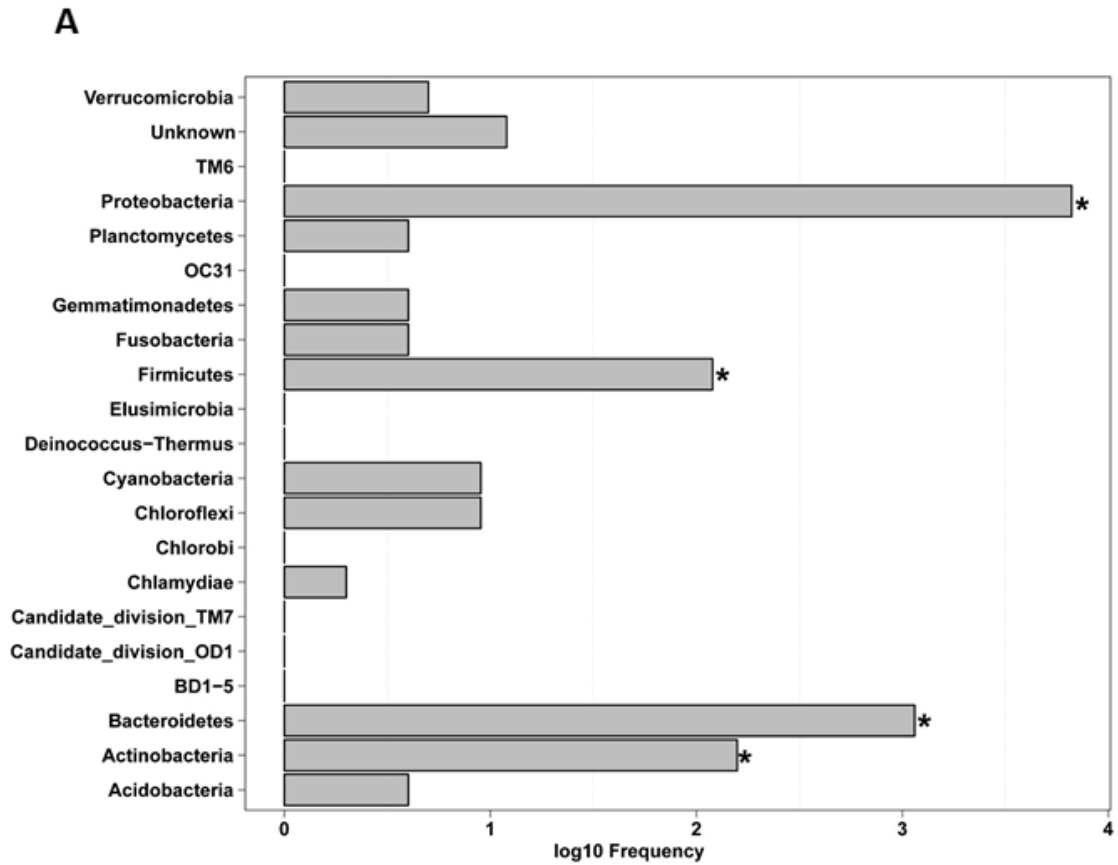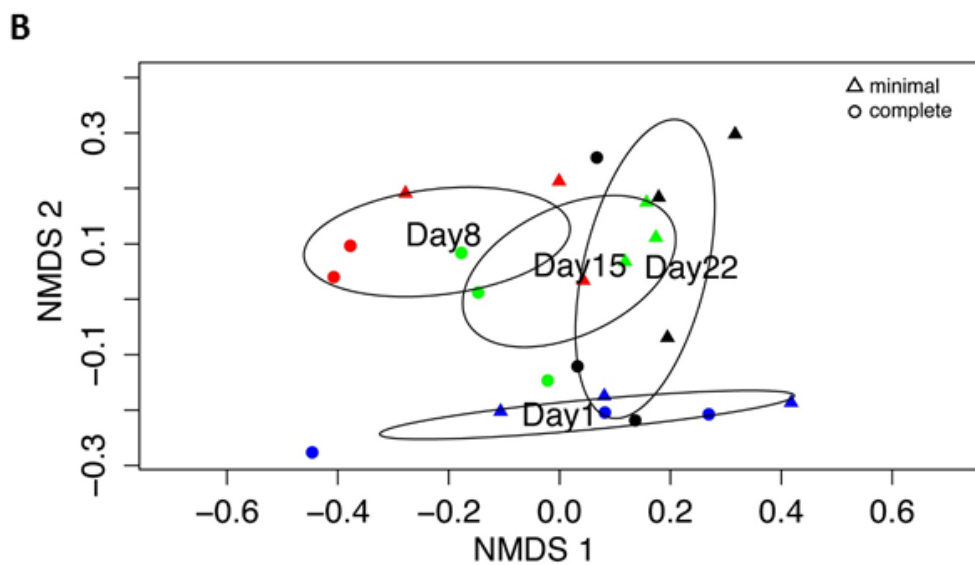

149

150 **Figure 1. (A) Distribution of Operational Taxonomic Unit (OTU) abundance (LOG scaled) within**  
151 **phyla from complete data set.** The bins marked with asterisks correspond to 99.97% of all which  
152 belong to Proteobacteria, Bacteroidetes, Actinobacteria and Firmicutes. **(B) Ordination plot of**  
153 **bacterial community in the two media conditions for all sampling points.** To compare the species  
154 composition between the different samples (days / media) we used a non-metric  
155 multidimensional scaling (NMDS) function based on generalised UniFrac distances (Chen *et al.*,  
156 2012). Triangles and circles correspond to minimal media and complete media conditions,  
157 respectively. Blue represents Day 1. Red represents Day 8. Green represents Day 15. Black  
158 represents Day 22. The ellipses correspond to the 99% confidence interval to each group centroid.

159 Rarefaction curves were used to evaluate the alpha diversity in the different media conditions as well  
160 as at the different time points (Supplementary Figure S4). Species richness in both minimal and  
161 complete media was ~3000. Species richness over time remained between ~2400 and ~2600, with  
162 reduced species richness (~1300) on Day 8 (both minimal and complete media) possibly due to  
163 elevated levels of 16S *P. tricornutum* chloroplast reads which had to be omitted. Greatest species  
164 richness (~3000) was shown on Day 22. Overall, all datasets showed less increase in the number of  
165 unique species as the sample size increased, confirming adequate species richness in all culture  
166 conditions.

167 To compare the species composition between the different samples (days/media) we used a non-  
168 metric multidimensional scaling (NMDS) function based on generalised UniFrac distances (Chen *et al.*,  
169 2012). We observed a clear divergence in the bacterial community in the two media conditions.  
170 Ordination based on the sampling day indicated that the bacterial community was dynamic with a  
171 clear divergence visible between Day 1 and the other three sampling days. Day 15 and 22 showed a  
172 slight overlap (Figure 2). An adapted version of PermanovaG was used to carry out permutational  
173 multivariate analysis of variance using multiple distance matrices which were previously calculated  
174 based on the generalised UniFrac distance (Chen *et al.*, 2012). The significance for the test was  
175 assessed by 5000 permutations. The results of the PermanovaG tests support the NMDS ordination,



176 confirming a statistically significant effect in the bacterial community profile at the different sampling  
 177 points and in the two media conditions whereas no significant effect was found in the experimental  
 178 replicates (Supplemental Figure S5).

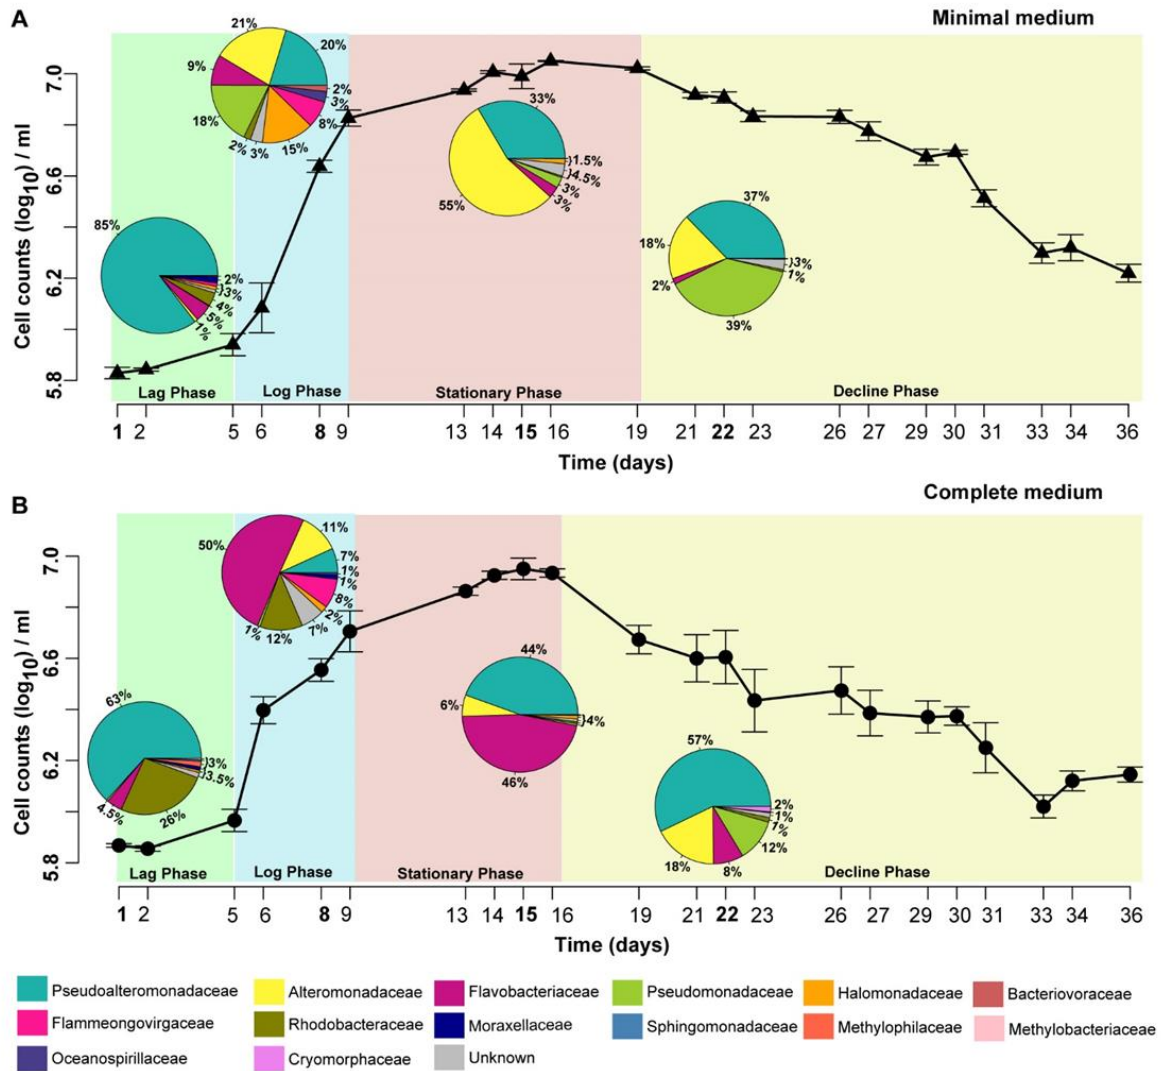

179

180 **Figure 2. Bacterial community profile of *Phaeodactylum tricornutum* cultures over time and in**

181 **differing media conditions.** Both panels illustrate the growth of *P. tricornutum* (CCAP 1052/1B)

182 over a 36 day period. The growth curves have been partitioned into lag (green), log (blue),

183 stationary (red), and decline (yellow) phases. The abundance (%) of the 'Top Ten' bacterial families

184 (corresponding colours described in the key) is depicted in pie charts on Days 1, 8, 15 and 22 in

185 both media conditions. The existence of one dominant family at each investigated time point is a

186 peculiar characteristic. In **minimal media (A)**, the lag phase of *P. tricornutum* growth is dominated

187 by Pseudoalteromonadaceae (85%). However, during the log phase, a wide diversity of bacterial  
188 families is observed, with members of the Alteromonadaceae family (21%) beginning to dominate.  
189 During the stationary phase, a clear dominance of Alteromonadaceae species (55%) in the  
190 community can be observed. The decline phase, however, shows the Pseudomonadaceae (39%)  
191 as a dominant family, with Pseudoalteromonadaceae species (37%) increasing in abundance again.  
192 In **complete media (B)**, the lag phase is also dominated by Pseudoalteromonadaceae (63%).  
193 During the log phase, 50% of the community is composed of members of the Flavobacteriaceae  
194 family, with the other 50% distributed amongst a number of different families. Flavobacteriaceae  
195 (46%) remain high in abundance during the stationary phase, with Pseudoalteromonadaceae  
196 species (44%) beginning to increase in abundance again. As for minimal media (A),  
197 Pseudoalteromonadaceae (57%) show clear dominance of the community during the decline  
198 phase.

#### 199 **Effect of temporal evolution and media composition on the bacterial community profile**

200 We compared the bacterial community profiles over time and in the different media conditions at the  
201 family level so as to avoid diluting the signal of the less abundant genera. Supplementary Figure S6  
202 shows no dynamical difference within the genera that cannot be observed at the family level. By  
203 investigating the bacterial community dynamics at the family level, we also include taxonomical  
204 information that is unavailable at the genus level.

205 Overall, the families over-represented in all samples are Pseudoalteromonadaceae,  
206 Alteromonadaceae, Flavobacteriaceae and Pseudomonadaceae. Figure 2 illustrates the temporal  
207 evolution of the bacterial community in both minimal and complete media with a unique composition  
208 at each time point. A remarkable feature is that at all investigated time points there exist one or two  
209 dominant families.

#### 210 **Bacterial community in complete media**

211 Members of the Pseudoalteromonadaceae family were highly abundant when *P. tricorutum* cell  
212 densities are low (63% and 57% on Day 1 and Day 22, respectively). Flavobacteriaceae species

213 dominated (50%) when the *P. tricornutum* culture is growing exponentially (Day 8). Day 15, when *P.*  
214 *tricornutum* cell densities are at their highest, shows co-dominance of both Flavobacteriaceae (46%)  
215 and Pseudoalteromonadaceae (44%).

#### 216 **Bacterial community in minimal media**

217 Similarly, in the minimal media, members of the Pseudoalteromonadaceae family were highly  
218 abundant when *P. tricornutum* cell densities are low. However, on Day 22 Pseudomonadaceae (39%)  
219 and Pseudoalteromonadaceae (37%) are both overrepresented. When the *P. tricornutum* culture is  
220 growing exponentially (Day 8) a cluster of Families dominate; namely Alteromonadaceae (21%),  
221 Pseudoalteromonadaceae (20%), Pseudomonadaceae (18%), Halomonadaceae (15%) and  
222 Flavobacteriaceae (9%). When the cell density of *P. tricornutum* peaks (Day 15), the  
223 Alteromonadaceae species take over (55%).

224 The bacterial communities within the two media conditions on Day 1 are more closely related than  
225 the communities on days 8 and 15 (see Table S2 for generalised UniFrac distances). As the cultures  
226 begin to 'crash' (Day 22), the bacterial communities in the two media conditions increase in similarity  
227 again.

228 In general, the main families identified show a distinct pattern of disappearance and regeneration  
229 within the bacterial community. In the complete media, Pseudoalteromonadaceae species start at  
230 63% (Day 1), drops in abundance to 7% (Day 8) then recovers to 57% (Day 22). Flavobacteriaceae  
231 species, in complete media, start at 4.5% (Day 1), increases in abundance to 50% (Day 8), and then  
232 falls back to 8% (Day 22). In the minimal media, Alteromonadaceae species have an abundance of only  
233 1% (Day 1), peaks at 55% (Day 15), and decreases down to 18% (Day 22).

#### 234 **Mathematical model**

235 The dynamic changes of the bacterial communities associated with *P. tricornutum* at different growth  
236 stages led us to the formulation of a network of bacteria - diatom interactions. In order to test its

237 plausibility, we developed a qualitative mathematical model starting from few key assumptions about  
238 nutrients availability and metabolite exchange between the organisms involved, i.e. *P. tricornutum*  
239 and general representatives of the four most abundant bacteria families Pseudoalteromonadaceae,  
240 Alteromonadaceae, Flavobacteriaceae and Pseudomonadaceae.  
241 In Figure 3A and B we show the simulation results from the model performed in complete media and  
242 minimal media conditions, respectively, with experimental data superimposed. The top panel shows  
243 biomasses of the five organisms (data available only for the diatom), the bottom panel shows relative  
244 bacteria abundance versus time (biomass divided by total bacteria biomass). The figures show that  
245 the model is able to reproduce the main features of the bacterial community dynamics, like the  
246 disappearance and return of Pseudoalteromonadaceae in complete media and the peak of  
247 Alteromonadaceae at the end of the diatom's exponential growth phase in minimal media. Because  
248 of the qualitative nature of the model, units are arbitrary and the parameters used for simulation do  
249 not claim any biological significance (see Supplementary Model Information for more details).

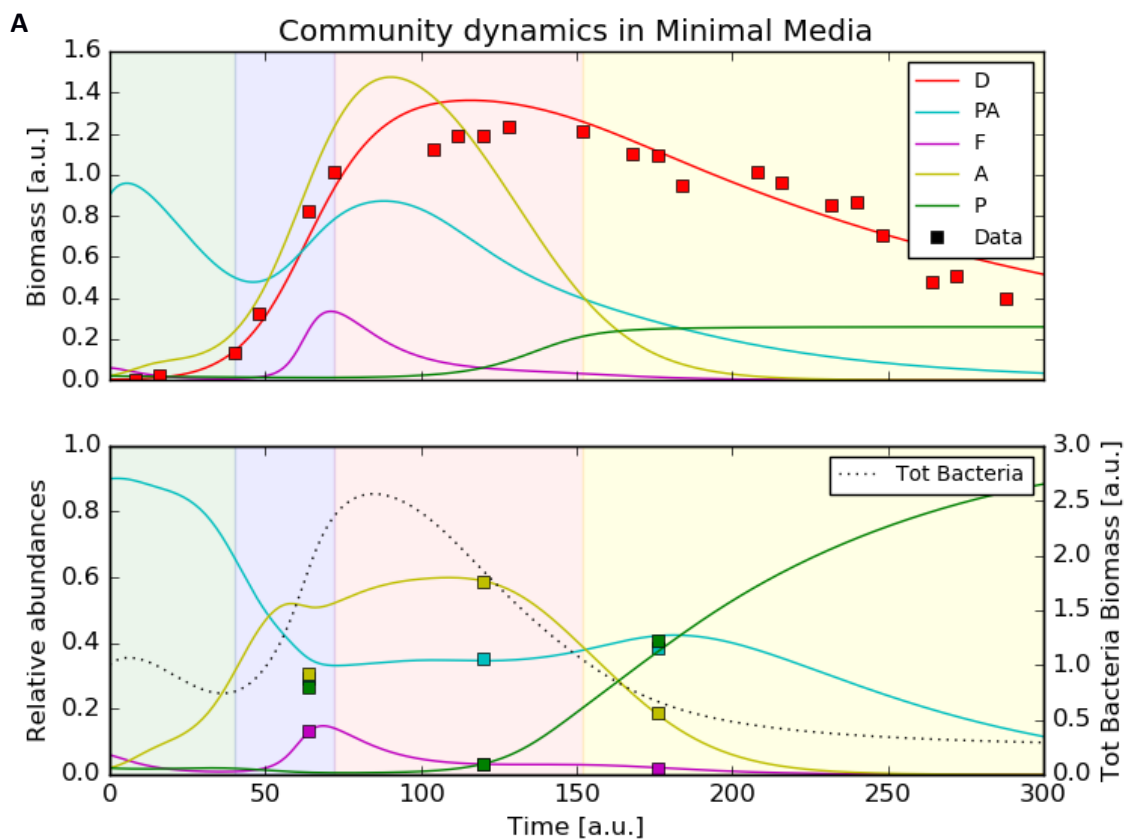

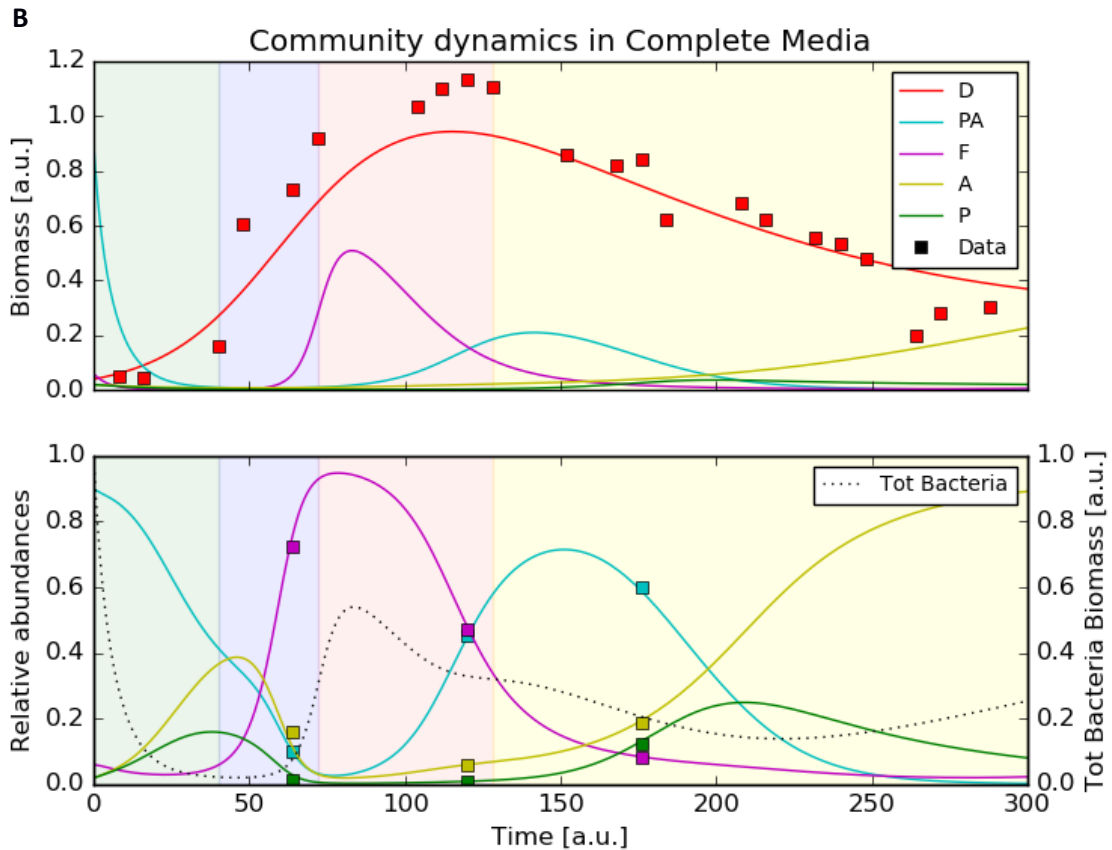

250

251

252

253

254

255

256

257

258

259

**Figure 3A and B. Simulation results (lines) and experimental data (squares)** for communities of *P. tricornutum* (D), Pseudoalteromonadaceae (PA), Flavobacteriaceae (F), Alteromonadaceae (A) and Pseudomonadaceae (P) in minimal (A) and complete (B) media conditions. The top panel shows the biomass time course (arbitrary units) for the five organisms and the rescaled data points (squares) for the *P. tricornutum*. The bottom panel shows the variations in relative abundances of the four bacteria (single bacteria biomass/total bacteria biomass) over time and the three sets of data points from the sequencing analysis (the first data point is used as starting condition at time 0). Also shown in the bottom plot (dotted line, right y-axis) is the total bacterial biomass in arbitrary units.

## 260 Discussion

261

262

In nature, *Phaeodactylum tricornutum* is not an isolated sovereign entity impassive to its environment including other organisms. In fact, it is part of a complex ecosystem, which is poorly understood. To

263 reduce the complexity of a natural system, but nevertheless to gain valuable insights into the dynamics  
264 of the bacterial communities associated with diatoms, we investigated here non-axenic cultures of  
265 laboratory strains of *P. tricornutum*. Our results showed the trends of the bacterial community  
266 dynamics during the batch growth of the *P. tricornutum*.

267 To progress towards the goal of creating a synthetic community, an in-depth understanding of the  
268 naturally occurring diatom-bacterial interactions, which are predominantly based on a ‘biological  
269 barter trade system’ between diatoms and bacteria – where substances such as trace metals, vitamins,  
270 and nutrients (nitrate, phosphate, silicate, carbon) are traded – is necessary. Based on our findings  
271 and additional insights from previous studies on diatom-bacterial interactions as well as on existing  
272 characterisation of known species from each family, we will postulate the role of the particular  
273 bacterial families in the *P. tricornutum* cultures. From this we will derive a mathematical model with  
274 the aim of reproducing the dynamical evolution of the community composition over time.

275 The growth dynamics of *P. tricornutum* in the two media conditions showed an accelerated ‘culture  
276 crash’ in the complete media compared to the minimal media, which suggests a more stable culture  
277 in the minimal media (Figure 2). Simultaneously, the dynamics of the bacterial community reveals that  
278 the community in the minimal media increases in complexity over time. The link between ecosystem  
279 complexity and stability based on theoretical and experimental data has been debated by ecologists  
280 for over half a century (MacArthur, 1955; Elton, 1958; Gardner and Ashby, 1970; Pimm, 1984). Our  
281 observations are in agreement with more recent hypotheses indicating that diversity generally  
282 increases the stability of an ecosystem (McCann, 2000).

### 283 **Prospective role of central bacterial families**

284 The putative roles of each of the dominant families are illustrated in Figure 4. The presence of  
285 **Pseudoalteromonadaceae** species is not unexpected as members of this family have been isolated  
286 from coastal, open and deep-sea waters, sediments, marine invertebrates, as well as marine fish and  
287 algae (Ivanova *et al.*, 2004). The Pseudoalteromonadaceae family has three genera, namely

288 *Pseudoalteromonas*, *Algicola* and *Psychrosphaera* (Rosenberg *et al.*, 2014, 28). Several species of  
289 Pseudoalteromonadaceae are reported to possess antibiotic properties with bactericidal effects  
290 (Bowman, 2007). For example, concentrated supernatant of a marine bacterium *Pseudoalteromonas*  
291 *sp.* strain A28 contained various enzymes including proteases, DNases, cellulases, and amylases,  
292 capable of causing the lysis of the diatom *Skeletonema costatum* (Lee *et al.*, 2000). Species of  
293 Pseudoalteromonadaceae are also capable of producing cold-adapted enzymes (Venkateswaran and  
294 Dohmoto, 2000; Chen *et al.*, 2007; Khudary *et al.*, 2010; Lu *et al.*, 2010; Albino *et al.*, 2012; He *et al.*,  
295 2012). Pseudoalteromonadaceae species can produce extracellular polymeric substances allowing  
296 them to colonise surfaces, enhancing nutrient uptake whilst limiting diffusion of particular substances  
297 across the cell membrane (Holmström and Kjelleberg, 1999). The ability of Pseudoalteromonadaceae  
298 species to suppress the growth of competing bacteria could explain the dominance of  
299 Pseudoalteromonadaceae in almost all cultures irrespective of media composition, particularly when  
300 *P. tricorutum* abundance is limited (Figure 2, Days 1 and 22). *P. tricorutum* on the other hand, may  
301 protect other bacterial community members from the bacteriolytic ability of  
302 Pseudoalteromonadaceae by producing specific antibacterial compounds themselves. Desbois *et al.*  
303 showed that *P. tricorutum* excreted bacteriolytic fatty acids such as eicosapentaenoic acid (EPA;  
304 20:5n-3), nucleotides, peptides, and pigment derivatives that can eliminate unwanted competition for  
305 nutrients such as organic phosphates from certain bacteria (Desbois *et al.*, 2009).



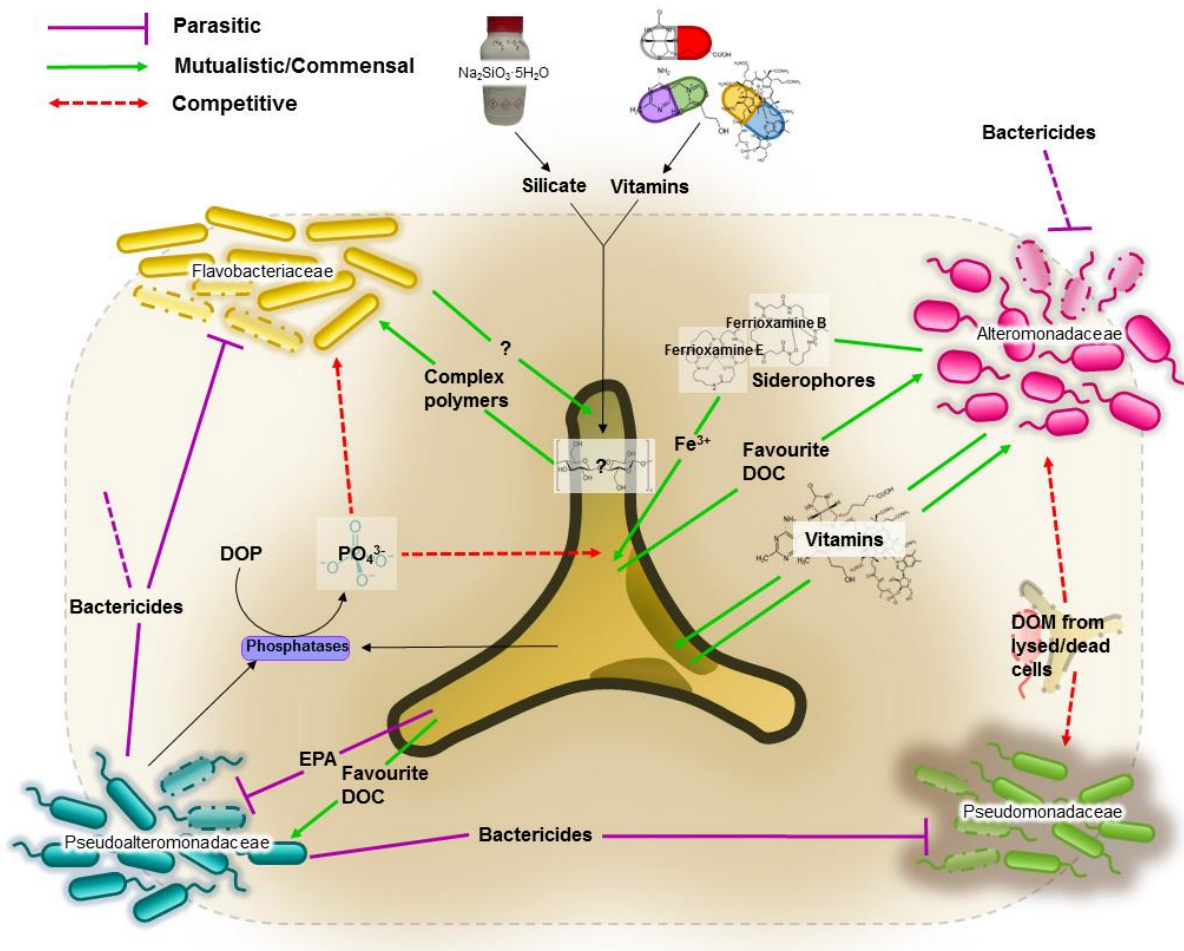

306

307

308

309

310

311

312

313

314

315

316

317

318

319

**Figure 4. Network of putative interactions between *Phaeodactylum tricornutum* and identified bacterial families.** The dotted grey line depicts the 'phycosphere'; a term coined by Bell and Mitchell in 1972 as an aquatic equivalent of the 'rhizosphere', denoting the region extending outwards from the algal cell in which bacterial growth is stimulated by extracellular products of the alga (Bell and Mitchell, 1972). **Bactericidal Effects.** Several species of the Pseudoalteromonadaceae family have been reported to possess bactericidal effects (Bowman, 2007). *P. tricornutum*, however, can excrete fatty acids (such as eicosapentaenoic acid or EPA), nucleotides, peptides, and pigment derivatives to protect themselves against opportunistic attack or pathogenic damage (Desbois *et al.*, 2009). **Iron.** Siderophores are a group of iron scavengers that act by chelating iron (III). Siderophores are produced and excreted by bacteria, and some cyanobacteria, which then reuptake the siderophores with bound iron (III) via outer-membrane transporters that are siderophore-specific (Vraspir and Butler, 2009). Diatoms are not known to produce siderophores (Soria-Dengg and Horstmann, 1995; Amin *et al.*, 2009). However, based on



320 genome sequence analyses, the presence of a gene orthologue of a bacterial ferrichrome binding  
321 protein suggests the possibility of iron (III)-siderophore utilisation by *P. tricornutum*. Furthermore,  
322 it was shown that *P. tricornutum* was able to uptake siderophores ferrioxamines B and E (Soria-  
323 Dengg and Horstmann, 1995). **Vitamins.** Prokaryotes are thought to be the main producers of B  
324 vitamins (Provasoli, 1963; Provasoli and Carlucci, 1974). Although *P. tricornutum* does not require  
325 cobalamin, thiamine and biotin (Croft *et al.*, 2006), production of organic compounds such as EPA  
326 can be considerably enhanced by the bioavailability of co-factors such as cobalamin  
327 (Yongmanitchai and Ward, 1991). This provides the basis for potential mutualistic interactions. For  
328 example, Alteromonadales, dominant in our cultures, are thought to be capable of producing B  
329 vitamins (Sañudo-Wilhelmy *et al.*, 2014). **Dissolved Organic Carbon (DOC).** It is estimated that up  
330 to 50% of carbon fixed via phytoplankton-mediated photosynthesis is utilised by marine bacteria  
331 (Azam *et al.*, 1983), mainly as DOC compounds, defined as the organic material <0.7µm in size  
332 (Stocker, 2012). DOC from diatoms originates either from live cells or recently lysed or grazed cells,  
333 which determines the type of DOCs available, and therefore likely determining the bacterial  
334 consortia associated with the diatom (Amin *et al.*, 2012). **Dissolved Organic Phosphate (DOP).**  
335 Both diatoms and bacteria primarily utilise orthophosphate as a source of phosphorus. However,  
336 to access phosphate from DOP compounds, both diatoms and bacteria developed mechanisms  
337 such as the excretion of enzymes, including phosphatases, to release orthophosphate (PO<sub>4</sub><sup>3-</sup>) from  
338 DOP. The mechanism is not species-specific, which consequently means the ‘free’  
339 orthophosphates can be acquired by any organism (Persson *et al.*, 1988).

340 The **Alteromonadaceae** family consists of 16 (yet annotated) named genera (LPSN, 2016a) found  
341 predominantly in marine environments (Rosenberg *et al.*, 2014, 5). Members of this family were  
342 isolated from nutrient-rich environments such as coastal, open, and deep-sea waters, sediments,  
343 marine invertebrates and vertebrates, algae, and temperate and Antarctic marine environments  
344 (Ivanova and Mikhaïlov, 2001). They are able to utilise a vast array of compounds as carbon sources;  
345 from glucose to glycerol (Rosenberg *et al.*, 2014, 5). Members of this family are known siderophore  
346 producers (Reid and Butler, 1991; Holt *et al.*, 2005; Amin *et al.*, 2009). Greek for ‘iron carrier’,

347 siderophores are a group of iron scavengers that act by chelating iron (III) that are produced and  
348 excreted by bacteria, and some cyanobacteria, which then reuptake the siderophores with bound iron  
349 (III) via outer-membrane transporters that are siderophore-specific (Vraspir and Butler, 2009). Iron  
350 acquisition is essential for biological processes such as photosynthesis, respiration and nitrogen  
351 fixation. Most bioactive trace metals, including iron, exist at nanomolar ( $10^{-9}$  M) to picomolar ( $10^{-12}$   
352 M) concentrations in our oceans, approximately one-millionth of the intracellular concentration in  
353 diatoms (Bruland *et al.*, 1991; Morel and Price, 2003). Diatoms are not known to produce siderophores  
354 (Soria-Dengg and Horstmann, 1995; Amin *et al.*, 2009) but previous studies have shown that diatoms  
355 can use siderophores as an iron source (Soria-Dengg *et al.*, 2001). However, based on genome  
356 sequence analyses, the presence of a gene orthologue of a bacterial ferrichrome-binding protein  
357 suggests the possibility of iron (III)-siderophore utilisation by *P. tricornutum* (Soria-Dengg and  
358 Horstmann, 1995). No trace metals, including iron (III), were provided to minimal media cultures.  
359 However, natural seawater may contain minute traces of bioactive trace metals. The high abundance  
360 of Alteromonadaceae in the minimal media suggests a potential supportive role in sequestering traces  
361 of iron (III) that may be present in the sterile natural seawater to the *P. tricornutum* (Figure 2). This is  
362 further supported by the very low level of Alteromonadaceae in the complete media (11% in complete  
363 media compared to 55% in minimal media, both on Day 15) where the culture has been supplied with  
364 11.7  $\mu$ M of iron (III) chloride hexahydrate.

365 **Flavobacteriaceae** are members of the Bacteroidetes phylum and include over 120 genera (LPSN,  
366 2016b) found in soil, sediments and seawater (see (Yoon *et al.*, 2015) for further references).  
367 Flavobacteriaceae belong within the Cytophaga-Flavobacterium cluster which has been shown to  
368 account for more than 10% of the total bacterial community in coastal and offshore waters (Glöckner  
369 *et al.*, 1999; Abell and Bowman, 2005; DeLong *et al.*, 2006). Members of Flavobacteriaceae are  
370 proficient degraders of various biopolymers such as cellulose, chitin and pectin (Manz *et al.*, 1996;  
371 Kirchman, 2002). They were shown to be omnipresent during phytoplankton blooms, and their

372 preference for consuming more complex polymers rather than monomers suggests an active role in  
373 the processing of organic matter during these blooms (Cottrell and Kirchman, 2000; Pinhassi *et al.*,  
374 2004). Although the exact mechanisms behind them are not perfectly understood, algal blooms are a  
375 consequence of exponential growth of phytoplankton (Smayda, 1997). In this respect, the phase of  
376 exponential growth of *P. tricornutum* in complete media, when our results showed highest abundance  
377 of Flavobacteriaceae, is the artificial equivalent of an algal bloom of *P. tricornutum* (Figure 2). In the  
378 minimal media, the abundance of Flavobacteriaceae remains very low; at its maximum on Day 8 it  
379 only accounts for 9% of the total bacterial community. Members of the Flavobacteriaceae family could  
380 be more demanding than other bacteria that require lower nutrient levels to thrive. It is estimated  
381 that up to 50% of carbon fixed via phytoplankton-mediated photosynthesis is utilised by marine  
382 bacteria (Azam *et al.*, 1983), mainly as Dissolved Organic Carbon (DOC) compounds, defined as the  
383 organic material <0.7µm in size (Stocker, 2012). DOC from diatoms originates either from live cells or  
384 recently lysed or grazed cells, which determine the type of DOCs available, and therefore are likely to  
385 influence the bacterial consortia associated with the diatom (Amin *et al.*, 2012). This suggests a  
386 dynamic complexity within the bacterial consortia based solely on the type of DOC available. Members  
387 of the Flavobacteriaceae family might possess the genetic ability to utilise specific DOC produced by  
388 *P. tricornutum* grown in complete media.

389 **Pseudomonadaceae** are an extraordinarily diverse family of bacteria found in almost all habitats on  
390 Earth; in soils, freshwater as well as marine environments, as well as plant and animal-associated  
391 pathogens (Starr *et al.*, 1981, 58). Species from the *Pseudomonas* genus are the best studied of the  
392 Pseudomonadaceae family, whose sheer genetic diversity explains the ability to thrive in such a wide  
393 range of environments (Anzai *et al.*, 2000). Marine isolates from the *Pseudomonas* genus have been  
394 shown to produce a wide range of bioactive compounds, many of which exhibit antibacterial as well  
395 as antiviral properties (see (Isnansetyo and Kamei, 2009) for further references). Our results, indeed  
396 show an elevated level of Pseudomonadaceae OTUs evident on Day 22 of the complete media  
397 cultures, and on Days 8 and 22 of the minimal media cultures. The increased presence of

398 Pseudomonadaceae when *the P. tricornutum* culture has ‘crashed’ could be attributed to its ability to  
399 produce antibacterial compounds allowing members of this family to begin to thrive in the community  
400 through inhibition of its competitors. Given its exceptional genetic diversity, and thus, its metabolic  
401 versatility, allows for members of Pseudomonadaceae to be truly saprophytic; providing a  
402 hypothetical explanation of its abundance we could measure when the *P. tricornutum* cultures crash  
403 (Figure 2, Day 22 in both media conditions).

#### 404 **Mathematical Model**

405 We observed that the bacterial community associated with *Phaeodactylum tricornutum* cultures  
406 changed over time, correlating with the growth and subsequent crashing of the diatom cultures. The  
407 bioavailability or absence of vitamins, trace metals and silicon, as well as nutrients or bactericidal  
408 substances can alter the bacterial community. We built a mathematical model based on simple  
409 assumptions extracted from the putative roles we assigned to the dominant bacterial families (see  
410 Figure 4) and applied them to standard methods for modelling population dynamics. In particular, we  
411 introduced growth limitation from nutrients/micronutrients, as well as from bactericidal-induced  
412 death. An ordinary differential equation model cannot, of course, capture mechanisms such as  
413 metabolic shifts caused by changes in the environment such as the supplementation of minimal or  
414 complete media. Therefore, we did not implement a unique set of parameters for the model in the  
415 two conditions. The current qualitative model provides an important proof-of-concept to emphasise  
416 the validity of our assumptions, and serves as the motivation for further research bringing the model  
417 to a quantitative, predictive level. Indeed, mathematical models are powerful tools towards the goal  
418 of synthetic community establishment and control, and the model parameters can be experimentally  
419 measured to bring predictive power to the simulations.

#### 420 **Concluding remarks**

421 We postulate that a role within the community can be filled, not by one specific species of bacteria,  
422 but rather a number of bacterial species capable of carrying out said role. Which bacteria fill the role

423 is dependent upon the environmental characteristics and the prevailing needs of the community as a  
424 whole at any given time. If a niche is unfilled, bacteria with the ideal metabolic functionality will seize  
425 the opportunity and thrive within that niche. The absence of certain micronutrients creates a new  
426 niche that can be filled by a certain unique bacterial faction.

427 Further work is necessary to explore the hypotheses postulated in the Discussion section. This can be  
428 achieved by carrying out systematic co-culture experiments with culturable members of the bacterial  
429 families of interest. The role of each representative of the bacterial families can be identified by  
430 carrying out subsequent –omics studies, which provide a holistic view of the genes (genomics), mRNA  
431 (transcriptomics), proteins (proteomics) and metabolites (metabolomics) in a specific biological  
432 sample in a non-targeted and non-biased manner (Horgan and Kenny, 2011). The resulting  
433 experimental measurements will allow the dynamic model presented here to develop from qualitative  
434 to quantitative, providing a powerful predictive tool for culture monitoring such as predicting  
435 harvesting point based on the bacterial community.

## 436 **Materials and methods**

### 437 **Strains and culture conditions**

438 All *Phaeodactylum tricornutum* cultures were obtained from the Culture Collection of Algae and  
439 Protozoa (CCAP) based in Oban, Scotland (<http://www.ccap.ac.uk/our-cultures.htm>). All cultures are  
440 obtained non-axenic. Based on previous experimental evidence (unpublished data), the *P. tricornutum*  
441 strain CCAP1052/1B displayed optimal growth in 5L cultures. *P. tricornutum* was cultured in Guillard's  
442 medium for diatoms (F/2 + Si) in filtered natural seawater chemically sterilised using sodium  
443 hypochlorite and sodium thiosulphate pentahydrate. *P. tricornutum* was grown in two media  
444 conditions; (1) complete F/2 medium with the addition of sodium metasilicate as the source of silicon,  
445 as per Guillard and Ryther, 1962; Guillard, 1975, and (2) minimal media with a source of nitrogen  
446 (NaNO<sub>3</sub>) and phosphorus (NaH<sub>2</sub>PO<sub>4</sub>·2H<sub>2</sub>O) at the same concentration as in the F/2 medium recipe.

447 Recipe was obtained from the Culture Collection of Algae and Protozoa website (see  
448 <http://www.ccap.ac.uk/pdfrecipes.htm>). All cultures were grown in hanging 5L polyethylene bags  
449 with a 'V' shaped bottom prepared using a heat sealer (Supplementary Figure S1). All cultures had a  
450 modified aeration system provided by a 10ml pipette attached to the main pressurised air supply via  
451 0.2  $\mu\text{m}$  sterile air filters. A modified access port was created to allow for sampling and measurement  
452 of environmental parameters. Cultures were kept at 18-20°C and 24hr light at an average of 132.3  
453  $\mu\text{mol m}^{-2} \text{s}^{-1}$  using Phillips TL-D 58W 33-640 M9 fluorescent tube lights. All cultures, irrespective of  
454 media condition, were inoculated with 250ml from the same 5L stock culture of actively growing non-  
455 axenic *P. tricornutum*.

#### 456 **Growth measurements**

457 Growth was monitored every 24 to 48 h using a light microscope and carrying out cell counts of each  
458 culture in quadruplicates for each culture. During the cell counts the ratios of the four different  
459 morphotypes (oval, fusiform, triradiate and cruciform) were recorded, and descriptions of each  
460 culture noted. Samples of each culture were subsequently taken using a sterile 10ml syringe and  
461 placed in 50ml Falcon centrifuge tubes and placed in -20°C freezer.

#### 462 **Genomic DNA extraction**

463 All samples from Day 1, 8, 15, and 22 were thawed in a water bath set at 25°C. As per de Gouvion Saint  
464 Cyr *et al.*, 2014, samples were centrifuged for 5mins at 2000g to gather the *P. tricornutum* in the pellet  
465 while particles such as debris, other organisms, bacteria, and soluble substances remain in the  
466 supernatant. Because the bacteria might be attached to the *P. tricornutum* cells in the pellet, the pellet  
467 was washed with deionised water and then centrifuged for 5mins at 2000g. This was repeated twice.  
468 Genomic DNA extraction was carried out in the Aquaculture and Fisheries Development Centre and  
469 University College Cork. The Mo Bio's PowerWater® DNA Isolation Kit (catalogue no. 14900-100-NF)  
470 was utilised to carry out the genomic DNA extraction. The protocol provided with the kit was followed.

471 Presence of gDNA was detected by running a 1% agarose-ethidium bromide gel with 72 wells. The  
472 samples were sent on dry ice to Heinrich Heine University, Düsseldorf, for the V6 16S sequencing.

### 473 **Barcoded 16S-V6-Next Generation Sequencing**

474 Ion Torrent™ barcoded Next Generation Sequencing protocol was used to sequence the bacterial  
475 gDNA (Quail *et al.*, 2012; Grada and Weinbrecht, 2013). Amplification of the V6 hyper variable region  
476 of 16S rRNA with forward and reverse primers (Supplementary Table S2) was carried out. Ion  
477 Reporter™ software assembles all the raw sequencing data and sorts all the reads using the unique  
478 sample-specific barcode sequences and removes them from the reads. The outcome is raw FASTQ files  
479 which are ready for analysis using bioinformatics tools.

### 480 **Bioinformatics**

481 A total of 87,077,374 reads were identified. The smallest sample was just over 1 million reads; the  
482 largest sample was just under 10 million reads. The sequencing data was subjected to a pipeline  
483 adapted and modified from Pylro *et al.*, 2014. Primers were trimmed with fastq-mcf (version 1.04.807)  
484 (Aronesty, 2011), the resulting sequences were quality filtered and clustered into OTUs (operational  
485 taxonomic units) with usearch (version 8.0.1517; 32Bit – opensource) (Edgar, 2010, 2013). Taxonomy  
486 assignment was done by QIIME (version 1.9.0) (Caporaso *et al.*, 2010) with the implemented uclust  
487 classifier based on 97% sequence identity to the reference 16S sequences from SILVA 111 database  
488 (Quast *et al.*, 2013). Statistical analyses were performed in R (R Development Core Team, 2015).  
489 The complete protocol containing all processing steps is available on <https://github.com/QTB-HHU>.

### 490 **Modelling approach**

491 Population dynamics models have been developed since quite some time (Verhulst, 1838; Lotka, 1925;  
492 Volterra, 1926) spanning the broad fields of ecology, epidemiology and economics. Starting from our  
493 understanding of the organism-to-organism interactions, we developed a dynamic model consisting

494 of 13 ordinary differential equations and including 56 (55 free) parameters. The parameters are fitted  
495 using a genetic algorithm (Mitchell, 1996) which is run in different steps to optimise the fit of *P.*  
496 *tricornutum* growth and/or the bacteria relative abundances to the experimental data in evolving  
497 system conditions (see Supplementary Model Information). The model is written in Python (Python  
498 Software Foundation, <https://www.python.org/>) and is available on GitHub ([https://github.com/QTB-](https://github.com/QTB-HHU/communityODE)  
499 [HHU/communityODE](https://github.com/QTB-HHU/communityODE)) with instructions and scripts for running.

## 500 **Acknowledgements**

501 This research was funded by the Marie Curie Initial Training Network project ‘AccliPhot’ (grant  
502 agreement number PITN-GA-2012-316427). Genomic DNA extraction was carried out at the  
503 Aquaculture and Fisheries Development Centre, University College Cork, Ireland (funded by Beaufort  
504 Marine Research Award in Fish Population Genetics funded by the Irish Government under the Sea  
505 Change Programme). Barcoded 16S-V6-Next Generation Sequencing was carried out by the Genomics  
506 and Transcriptomics Laboratory at Heinrich-Heine University, Düsseldorf, Germany. OP and OE are  
507 funded by Deutsche Forschungsgemeinschaft, Cluster of Excellence on Plant Sciences, CEPLAS (EXC  
508 1028).

## 509 **Competing interests**

510 To the best of our knowledge, we do not have competing interest to declare.

## 511 **References**

- 512 Abell, G. and Bowman, J. (2005) Ecological and biogeographic relationships of class Flavobacteria in the Southern  
513 Ocean. *FEMS Microbiol. Ecol.* **51**: 265–277.
- 514 Albino, A., Marco, S., and Maro, A. Di (2012) Characterization of a cold-adapted glutathione synthetase from the  
515 psychrophile *Pseudoalteromonas haloplanktis*. *Mol. Biosyst.* **8**: 2405–2414.
- 516 Amin, S.A, Green, D.H., Hart, M.C., Küpper, F.C., Sunda, W.G., and Carrano, C.J. (2009) Photolysis of iron,  
517 siderophore chelates promotes bacterial, algal mutualism. *Proc. Natl. Acad. Sci.* **106**: 17071–17076.
- 518 Amin, S.A, Parker, M.S., and Armbrust, E.V. (2012) Interactions between diatoms and bacteria. *Microbiol. Mol.*



- 519 *Biol. Rev.* **76**: 667–84.
- 520 Amin, S.A., Hmelo, L.R., van Tol, H.M., Durham, B.P., Carlson, L.T., Heal, K.R., et al. (2015) Interaction and  
521 signalling between a cosmopolitan phytoplankton and associated bacteria. *Nature* **522**: 98–101.
- 522 Anzai, Y., Kim, H., Park, J., Wakabayashi, H., Oyaizu, H., and The, P. (2000) Phylogenetic affiliation of the  
523 pseudomonads based on 16S rRNA sequence become a dumping ground for incompletely characterized  
524 polarly flagellated, of 128 valid and invalid *Pseudomonas* species, which included almost valid species of  
525 the genus *Pseudomona*. *Int. J. Syst. Evol. Microbiol.* **50**: 1563–1589.
- 526 Aronesty, E. (2011) Command-line tools for processing biological sequencing data. *Expr. Anal. Durham NC*.
- 527 Azam, F., Fenchel, T., Field, J., Gray, J., Meyer-Reil, L., and Thingstad, F. (1983) The Ecological Role of Water-  
528 Column Microbes in the Sea. *Mar. Ecol. Prog. Ser.* **10**: 257–263.
- 529 Bell, W. and Mitchell, R. (1972) Chemotactic and growth responses of marine bacteria to algal extracellular  
530 products. *Biol. Bull.* **143**: 265–277.
- 531 Bhattacharya, D., Archibald, J.M., Weber, A.P.M., and Reyes-Prieto, A. (2007) How do endosymbionts become  
532 organelles? Understanding early events in plastid evolution. *BioEssays* **29**: 1239–1246.
- 533 Bowler, C., Allen, A.E., Badger, J.H., Grimwood, J., Jabbari, K., Kuo, A., et al. (2008) The *Phaeodactylum* genome  
534 reveals the evolutionary history of diatom genomes. *Nature* **456**: 239–244.
- 535 Bowman, J. (2007) Bioactive compound synthetic capacity and ecological significance of marine bacterial genus  
536 *Pseudoalteromonas*. *Mar. Drugs* **5**: 220–241.
- 537 Bruckner, C.G., Rehm, C., Grossart, H.P., and Kroth, P.G. (2011) Growth and release of extracellular organic  
538 compounds by benthic diatoms depend on interactions with bacteria. *Environ. Microbiol.* **13**: 1052–1063.
- 539 Bruland, K.W., Donat, J.R., and Hutchins, D.A. (1991) Interactive influences of bioactive trace metals on biological  
540 production in oceanic waters. *Limnol. Oceanogr.* **36**: 1555–1577.
- 541 Caporaso, J.G., Kuczynski, J., Stombaugh, J., Bittinger, K., Bushman, F.D., Costello, E.K., et al. (2010) QIIME allows  
542 analysis of high-throughput community sequencing data. *Nat. Methods* **7**: 335–336.
- 543 Chen, J., Bittinger, K., Charlson, E.S., Hoffmann, C., Lewis, J., Wu, G.D., et al. (2012) Associating microbiome  
544 composition with environmental covariates using generalized UniFrac distances. *Bioinformatics* **28**: 2106–  
545 2113.
- 546 Chen, X., Xie, B., Lu, J., He, H., and Zhang, Y. (2007) A novel type of subtilase from the psychrotolerant bacterium  
547 *Pseudoalteromonas* sp. SM9913: catalytic and structural properties of deseasein MCP-01. *Microbiology*  
548 **153**: 2116–2125.
- 549 Chisti, Y. (2007) Biodiesel from microalgae. *Biotechnol. Adv.* **25**: 294–306.
- 550 Cottrell, M.T. and Kirchman, D.L. (2000) Natural assemblages of marine proteobacteria and members of the  
551 *Cytophaga-Flavobacter* cluster consuming low- and high-molecular-weight dissolved organic matter. *Appl.*  
552 *Environ. Microbiol.* **66**: 1692–7.
- 553 Croft, M.T., Warren, M.J., and Smith, A.G. (2006) Algae need their vitamins. *Eukaryot. Cell* **5**: 1175–1183.
- 554 Dangeard, P.-A. (1933) *Traité d’algologie: introduction à la biologie et à la systématique des algues*. Paul  
555 Lechevalier & Fils.
- 556 Day, J.G., Thomas, N.J., Achilles-Day, U.E.M., and Leakey, R.J.G. (2012) Early detection of protozoan grazers in  
557 algal biofuel cultures. *Bioresour. Technol.* **114**: 715–719.

- 558 DeLong, E.F., Preston, C.M., Mincer, T., Rich, V., Hallam, S.J., Frigaard, N.-U., et al. (2006) Community genomics  
559 among stratified microbial assemblages in the ocean's interior. *Science* **311**: 496–503.
- 560 Delucca, R. and Mccracken, M.D. (1977) Observations on interactions between naturally-collected bacteria and  
561 several species of algae. *Hydrobiologia* **55**: 71–75.
- 562 Desbois, A.P., Mearns-Spragg, A., and Smith, V.J. (2009) A Fatty Acid from the Diatom *Phaeodactylum*  
563 *tricornutum* is Antibacterial Against Diverse Bacteria Including Multi-resistant *Staphylococcus aureus*  
564 (MRSA). *Mar. Biotechnol.* **11**: 45–52.
- 565 Dykhuizen, D. (1998) Santa Rosalia revisited: why are there so many species of bacteria? *Antonie Van*  
566 *Leeuwenhoek* **73**: 25–33.
- 567 Edgar, R.C. (2010) Search and clustering orders of magnitude faster than BLAST. *Bioinformatics* **26**: 2460–2461.
- 568 Edgar, R.C. (2013) UPARSE: highly accurate OTU sequences from microbial amplicon reads. *Nat. Methods* **10**:  
569 996–8.
- 570 Elton, C. (1958) *The Ecology of Invasions by Animals and Plants*. Methuen (ed) London.
- 571 Fajardo, A.R., Cerdán, L.E., Medina, A.R., Fernández, F.G.A., Moreno, P. a. G., and Grima, E.M. (2007) Lipid  
572 extraction from the microalga *Phaeodactylum tricornutum*. *Eur. J. Lipid Sci. Technol.* **109**: 120–126.
- 573 Gardner, M. and Ashby, W. (1970) Connectance of large dynamic (cybernetic) systems: critical values for  
574 stability. *Nature* **228**: 784.
- 575 Gause, G. (1934) *The Struggle for Existence*. Williams and Wilkins (ed) Baltimore (MD).
- 576 Glöckner, F.O., Fuchs, B.M., and Amann, R. (1999) Bacterioplankton compositions of lakes and oceans: a first  
577 comparison based on fluorescence in situ hybridization. *Appl. Environ. Microbiol.* **65**: 3721–6.
- 578 de Gouvion Saint Cyr, D., Wisniewski, C., Schrive, L., Farhi, E., and Rivasseau, C. (2014) Feasibility study of  
579 microfiltration for algae separation in an innovative nuclear effluents decontamination process. *Sep. Purif.*  
580 *Technol.* **125**: 126–135.
- 581 Grada, A. and Weinbrecht, K. (2013) Next-Generation Sequencing: Methodology and Application. *J. Invest.*  
582 *Dermatol.* **133**: e11–4.
- 583 Grima, E. and Fernández, F. (1999) Photobioreactors: light regime, mass transfer, and scaleup. *J. Biotechnol.* **70**:  
584 231–247.
- 585 Guillard, R. (1975) Culture of phytoplankton for feeding marine invertebrates. In, W. L. Smith and M. H. Chanley  
586 (ed), *Culture of marine invertebrate animals*. Plenum Press, New York, pp. 29–60.
- 587 Guillard, R. and Ryther, J. (1962) Studies of marine planktonic diatoms: i. *Cyclotella nana* Hustedt, and *Detonula*  
588 *confervacea* (Cleve) gran. *Can. J. Microbiol.* **8**: 229–239.
- 589 Hardin, G. (1960) The competitive exclusion principle. *Science* **131**: 1292–7.
- 590 He, H., Guo, J., Chen, X., Xie, B., and Zhang, X. (2012) Structural and functional characterization of mature forms  
591 of metalloprotease E495 from Arctic sea-ice bacterium *Pseudoalteromonas* sp. SM495. *PLoS One* **7**:  
592 e35442.
- 593 Holmström, C. and Kjelleberg, S. (1999) Marine *Pseudoalteromonas* species are associated with higher organisms  
594 and produce biologically active extracellular agents. *FEMS Microb. Ecol.* **30**: 285–293.
- 595 Holt, P.D., Reid, R.R., Lewis, B.L., Luther, G.W., and Butler, A. (2005) Iron(III) coordination chemistry of

- 596 alterobactin A: A siderophore from the marine bacterium *Alteromonas luteoviolacea*. *Inorg. Chem.* **44**:  
597 7671–7677.
- 598 Horgan, R.P. and Kenny, L.C. (2011) “Omic” technologies: genomics, transcriptomics, proteomics and  
599 metabolomics. *Obstet. Gynaecol.* **13**: 189–195.
- 600 Isnansetyo, A. and Kamei, Y. (2009) Bioactive substances produced by marine isolates of *Pseudomonas*. *J. Ind.*  
601 *Microbiol. Biotechnol.* **36**: 1239–1248.
- 602 Ivanova, E.P., Flavier, S., and Christen, R. (2004) Phylogenetic relationships among marine *Alteromonas*-like  
603 proteobacteria: Emended description of the family *Alteromonadaceae* and proposal of  
604 *Pseudoalteromonadaceae* fam. nov., *Colwelliaceae* fam. nov., *Shewanellaceae* fam. nov., *Moritellaceae*  
605 fam. nov., Ferri. *Int. J. Syst. Evol. Microbiol.* **54**: 1773–1788.
- 606 Ivanova, E.P. and Mikhaïlov, V. V (2001) A new family of *Alteromonadaceae* fam. nov., including the marine  
607 proteobacteria species *Alteromonas*, *Pseudoalteromonas*, *Idiomarina* i *Colwellia*. *Mikrobiologija* **70**: 15–  
608 23.
- 609 Kabir, S. (2009) The role of probiotics in the poultry industry. *Int. J. Mol. Sci.* **10**: 3531–3546.
- 610 Kates, M. and Volcani, B.E. (1966) Lipid components of diatoms. *Biochim. Biophys. Acta* **116**: 264–278.
- 611 Kazamia, E., Aldridge, D.C., and Smith, A.G. (2012) Synthetic ecology – A way forward for sustainable algal biofuel  
612 production? *J. Biotechnol.* **162**: 163–169.
- 613 Khudary, R. Al, Venkatachalam, R., and Katzer, M. (2010) A cold-adapted esterase of a novel marine isolate,  
614 *Pseudoalteromonas arctica*: gene cloning, enzyme purification and characterization. *Extremophiles* **14**:  
615 273–285.
- 616 Kim, S.M., Jung, Y., and Kwon, O. (2012) A Potential Commercial Source of Fucoxanthin Extracted from the  
617 Microalga *Phaeodactylum tricornutum*. *Appl. Biochem. Biotechnol.* **166**: 1843–1855.
- 618 Kirchman, D.L. (2002) The ecology of Cytophaga-Flavobacteria in aquatic environments. *FEMS Microbiol. Ecol.*  
619 **39**: 91–100.
- 620 Lee, S., Kato, J., Takiguchi, N., Kuroda, A., and Ikeda, T. (2000) Involvement of an Extracellular Protease in  
621 Algicidal Activity of the Marine Bacterium *Pseudoalteromonas* sp. Strain A28. *Appl. Environ. Microbiol.* **66**:  
622 4334–4339.
- 623 Lotka, A. (1925) *Elements of Physical Biology* Williams and Wilkins (ed).
- 624 LPSN (2016a) List of Prokaryotic names with Standing in Nomenclature - *Alteromonadaceae*.
- 625 LPSN (2016b) List of Prokaryotic names with Standing in Nomenclature - *Flavobacteriaceae*.
- 626 Lu, M., Wang, S., Fang, Y., Li, H., Liu, S., and Liu, H. (2010) Cloning, expression, purification, and characterization  
627 of cold-adapted  $\alpha$ -amylase from *Pseudoalteromonas arctica* GS230. *Protein J.* **29**: 591–597.
- 628 MacArthur, R. (1955) Fluctuations of animal populations and a measure of community stability. *Ecology*  
629 **36**: 533–536.
- 630 Manz, W., Amann, R., Ludwig, W., Vancanneyt, M., and Schleifer, K.H. (1996) Application of a suite of 16S rRNA-  
631 specific oligonucleotide probes designed to investigate bacteria of the phylum cytophaga-flavobacter-  
632 bacteroides in the natural environment. *Microbiology* **142**: 1097–1106.
- 633 Martino, A. De, Bartual, A., Willis, A., Meichenin, A., Villazán, B., Maheswari, U., and Bowler, C. (2011)  
634 Physiological and Molecular Evidence that Environmental Changes Elicit Morphological Interconversion in

- 635 the Model Diatom *Phaeodactylum tricornutum*. *Ann. Anat.* **162**: 462–481.
- 636 Martino, A. De, Meichenin, A., Shi, J., Pan, K., and Bowler, C. (2007) Genetic and phenotypic characterization of  
637 *Phaeodactylum tricornutum* (Bacillariophyceae) accessions 1. *J. Phycol.* **43**: 992–1009.
- 638 Mata, T., Martins, A., and Caetano, N. (2010) Microalgae for biodiesel production and other applications: a  
639 review. *Renew. Sustain. Energy Rev.* **14**: 217–232.
- 640 McCann, K.S. (2000) The diversity-stability debate. *Nature* **405**: 228–33.
- 641 Mitchell, M. (1996) An introduction to genetic algorithms MIT Press, Cambridge, MA.
- 642 Montsant, A., Jabbari, K., Maheswari, U., and Bowler, C. (2005) Comparative genomics of the pennate diatom  
643 *Phaeodactylum tricornutum*. *Plant Physiol.* **137**: 500–513.
- 644 Morel, F.M.M. and Price, N.M. (2003) The biogeochemical cycles of trace metals in the oceans. *Science* **300**: 944–  
645 7.
- 646 Owens, T.G. and Wold, E.R. (1986) Light-harvesting function in the diatom *Phaeodactylum tricornutum*: II.  
647 Distribution of excitation energy between the photosystems. *Plant Physiol.* **80**: 732–738.
- 648 Parmar, A., Singh, N., and Pandey, A. (2011) Cyanobacteria and microalgae: a positive prospect for biofuels.  
649 *Bioresour. Technol.* **102**: 10163–10172.
- 650 Parvez, S. and Malik, K. (2006) Probiotics and their fermented food products are beneficial for health. *J. Appl.*  
651 *Microbiol.* **100**: 1171–1185.
- 652 Peng, J., Yuan, J.P., Wu, C.F., and Wang, J.H. (2011) Fucoxanthin, a marine carotenoid present in brown seaweeds  
653 and diatoms: Metabolism and bioactivities relevant to human health. *Mar. Drugs* **9**: 1806–1828.
- 654 Persson, G., Jansson, M., and Kluwer, C. (1988) Phosphate uptake and utilization by bacteria and algae.  
655 *Hydrobiologia* **170**: 177–189.
- 656 Pimm, S. (1984) The complexity and stability of ecosystems. *Nature* **307**: 321–326.
- 657 Pinhassi, J., Sala, M.M., Havskum, H., Peters, F., Guadayol, O., Malits, A., and Marrasé, C. (2004) Changes in  
658 bacterioplankton composition under different phytoplankton regimens. *Appl. Environ. Microbiol.* **70**:  
659 6753–66.
- 660 Provasoli, L. (1958) Nutrition and ecology of Protozoa and Algae. *Annu. Rev. Microbiol.* **12**: 279–308.
- 661 Provasoli, L. (1963) Organic regulation of phytoplankton fertility. In, Hill, M. (ed), *The sea: ideas and observations*  
662 *on progress in the study of the seas*. Wiley-Interscience, New York, pp. 165–219.
- 663 Provasoli, L. and Carlucci, A. (1974) Vitamins and growth regulators. In, Stewart, W. (ed), *Algal Physiology and*  
664 *Biochemistry, Botanical monographs, 10*. Blackwell Scientific Publications, California, pp. 741–787.
- 665 Pylro, V.S., Roesch, L.F.W., Morais, D.K., Clark, I.M., Hirsch, P.R., and Tótola, M.R. (2014) Data analysis for 16S  
666 microbial profiling from different benchtop sequencing platforms. *J. Microbiol. Methods* **107**: 30–37.
- 667 Qi, Z., Zhang, X.-H., Boon, N., and Bossier, P. (2009) Probiotics in aquaculture of China — Current state, problems  
668 and prospect. *Aquaculture* **290**: 15–21.
- 669 Quail, M., Smith, M.E., Coupland, P., Otto, T.D., Harris, S.R., Connor, T.R., et al. (2012) A tale of three next  
670 generation sequencing platforms: comparison of Ion torrent, pacific biosciences and illumina MiSeq  
671 sequencers. *BMC Genomics* **13**: 341.

- 672 Quast, C., Pruesse, E., Yilmaz, P., Gerken, J., Schweer, T., Yarza, P., et al. (2013) The SILVA ribosomal RNA gene  
673 database project: improved data processing and web-based tools. *Nucleic Acids Res.* **41**: D590–D596.
- 674 R Development Core Team (2015) R: A language and environment for statistical computing. *R Found. Stat.*  
675 *Comput. Vienna, Austria.* <http://www.R-project.org/>.
- 676 Reboloso-Fuentes, M.M., Navarro-Pérez, A., Ramos-Miras, J.J., and Guil-Guerrero, J.L. (2001) Biomass nutrient  
677 profiles of the microalga *Phaeodactylum tricornutum*. *J. Food Biochem.* **25**: 57–76.
- 678 Reid, R. and Butler, A. (1991) Investigation of the mechanism of iron acquisition by the marine bacterium  
679 *Alteromonas luteoviolacea*: Characterization of siderophore production. *Limnol. Oceanogr.* **36**: 1783–  
680 1792.
- 681 Rosenberg, E., DeLong, E.F., Lory, S., Stackebrandt, E., and Thompson, F. eds. (2014) *The Prokaryotes* Springer  
682 Berlin Heidelberg, Berlin, Heidelberg.
- 683 Ryther, J. and Goldman, J. (1975) Microbes as food in mariculture. *Annu. Rev. Microbiol.* **29**: 429–443.
- 684 Sañudo-Wilhelmy, S. a., Gómez-Consarnau, L., Suffridge, C., and Webb, E. A. (2014) The Role of B Vitamins in  
685 Marine Biogeochemistry. *Ann. Rev. Mar. Sci.* **6**: 339–367.
- 686 Siron, R., Giusti, G., and Berland, B. (1989) Changes in the fatty acid composition of *Phaeodactylum tricornutum*  
687 and *Dunaliella tertiolecta* during growth and under phosphorus deficiency. *Mar. Ecol. Prog. Ser.* **55**: 95–  
688 100.
- 689 Smayda, T. (1997) Harmful algal blooms: their ecophysiology and general relevance to phytoplankton blooms in  
690 the sea. *Limnol. Oceanogr.* **42**: 1137–1153.
- 691 Soria-Dengg, S. and Horstmann, U. (1995) Ferrioxamines B and E as iron sources for the marine diatom  
692 *Phaeodactylum tricornutum*. *Mar. Ecol. Prog. Ser.* **127**: 269–277.
- 693 Soria-Dengg, S., Reissbrodt, R., and Horstmann, U. (2001) Siderophores in marine coastal waters and their  
694 relevance for iron uptake by phytoplankton: experiments with the diatom *Phaeodactylum tricornutum*.  
695 *Mar. Ecol. Prog. Ser.* **220**: 73–82.
- 696 Starr, M.P., Stolp, H., Trüper, H.G., Balows, A., and Schlegel, H.G. eds. (1981) *The Prokaryotes* Springer Berlin  
697 Heidelberg, Berlin, Heidelberg.
- 698 Stocker, R. (2012) Marine Microbes See a Sea of Gradients. *Science* **338**: 628–633.
- 699 Sunagawa, S., Coelho, L.P., Chaffron, S., Kultima, J.R., Labadie, K., Salazar, G., et al. (2015) Structure and function  
700 of the global ocean microbiome. *Science* **348**: 1–10.
- 701 Suminto and Hirayama, K. (1997) Application of a growth-promoting bacteria for stable mass culture of three  
702 marine microalgae. *Hydrobiologia* **358**: 223–230.
- 703 Tredici, M.R., Biondi, N., Ponis, E., Rodolfi, L., Zittelli, G.C., Burnell, G., and Allan, G. (2009) Advances in microalgal  
704 culture for aquaculture feed and other uses. In, Burnell, G. and Allan, G. (eds), *New Technologies in*  
705 *Aquaculture: Improving Production Efficiency, Quality and Environmental Management*. Woodhead  
706 Publishing Ltd, Cambridge, pp. 610–676.
- 707 Venkateswaran, K. and Dohmoto, N. (2000) *Pseudoalteromonas peptidolytica* sp. nov., a novel marine mussel-  
708 thread-degrading bacterium isolated from the Sea of Japan. *Int. J. Syst. Evol. Microbiol.* **50**: 565–574.
- 709 Verhulst, P. (1838) Notice sur la loi que la population suit dans son accroissement. correspondance  
710 mathématique et physique publiée par a. *Quetelet* **10**: 113–121.

- 711 Volterra, V. (1926) Fluctuations in the abundance of a species considered mathematically. *Nature* **118**: 558–560.
- 712 Vraspir, J.M. and Butler, A. (2009) Chemistry of marine ligands and siderophores. *Ann. Rev. Mar. Sci.* **1**: 43–63.
- 713 Wang, H., Zhang, W., Chen, L., Wang, J., and Liu, T. (2013) The contamination and control of biological pollutants  
714 in mass cultivation of microalgae. *Bioresour. Technol.* **128**: 745–750.
- 715 Whitman, W.B., Coleman, D.C., and Wiebe, W.J. (1998) Prokaryotes: the unseen majority. *Proc. Natl. Acad. Sci.*  
716 *U. S. A.* **95**: 6578–6583.
- 717 Yashodhara, B.M., Umakanth, S., Pappachan, J.M., Bhat, S.K., Kamath, R., and Choo, B.H. (2009) Omega-3 fatty  
718 acids: a comprehensive review of their role in health and disease. *Postgrad. Med. J.* **85**: 84–90.
- 719 Yongmanitchai, W. and Ward, O.P. (1991) Growth of and omega-3 fatty acid production by *Phaeodactylum*  
720 *tricornutum* under different culture conditions. *Appl. Environ. Microbiol.* **57**: 419–425.
- 721 Yoon, J., Jo, Y., Kim, G.J., and Choi, H. (2015) *Gramella lutea* sp. nov., a Novel Species of the Family  
722 Flavobacteriaceae Isolated from Marine Sediment. *Curr. Microbiol.* **71**: 252–8.
- 723



724 **Supplementary Material**

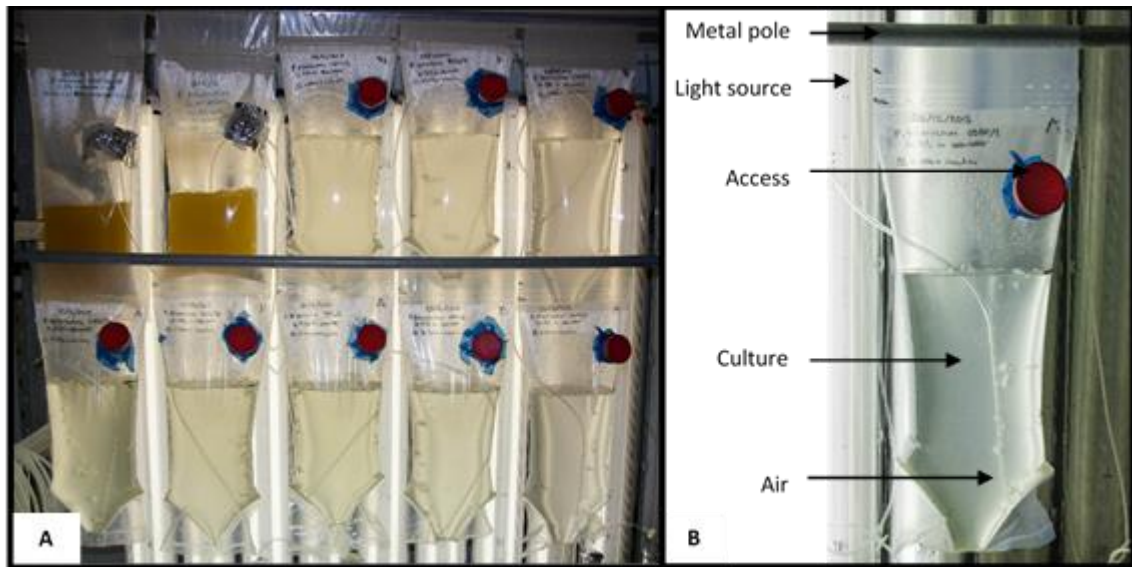

725

726 **Figure S1. Non-axenic *Phaeodactylum tricornutum* culture set up.** 5L polyethylene bags with a 'V'  
727 shaped bottom were created using the heat sealer machine. The bags were then rinsed and filled with  
728 5L of filtered seawater. Afterwards each bag was sealed and hung approximately 30 cm from the light  
729 source. A small incision was made to insert the aeration tubing. This consists of a 10ml pipette  
730 attached to silicon tubing which is attached to a sterile air filter connecting it to the main air supply. A  
731 modified access port was created to take samples and measure the environmental parameters  
732 (Photographs courtesy of Maria Rubio Bernal)

733

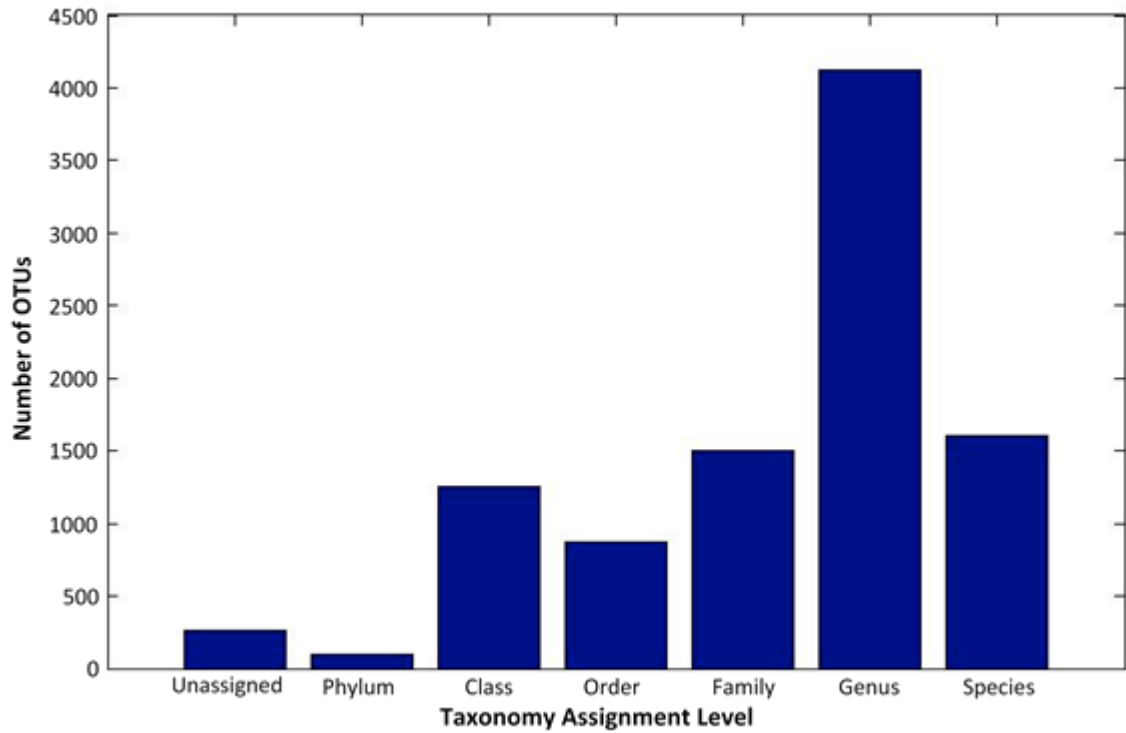

734

735 **Figure S2. Operational Taxonomic Unit (OTU) Taxonomy Assignment Level.** The 16S rRNA gene  
736 sequences were clustered to defined Operational Taxonomic Units (OTUs) at  $\geq 97\%$  sequence identity.  
737 Most OTUs could be assigned to the genera level, using the SILVA database (v.118) (Quast *et al.*, 2013).

738



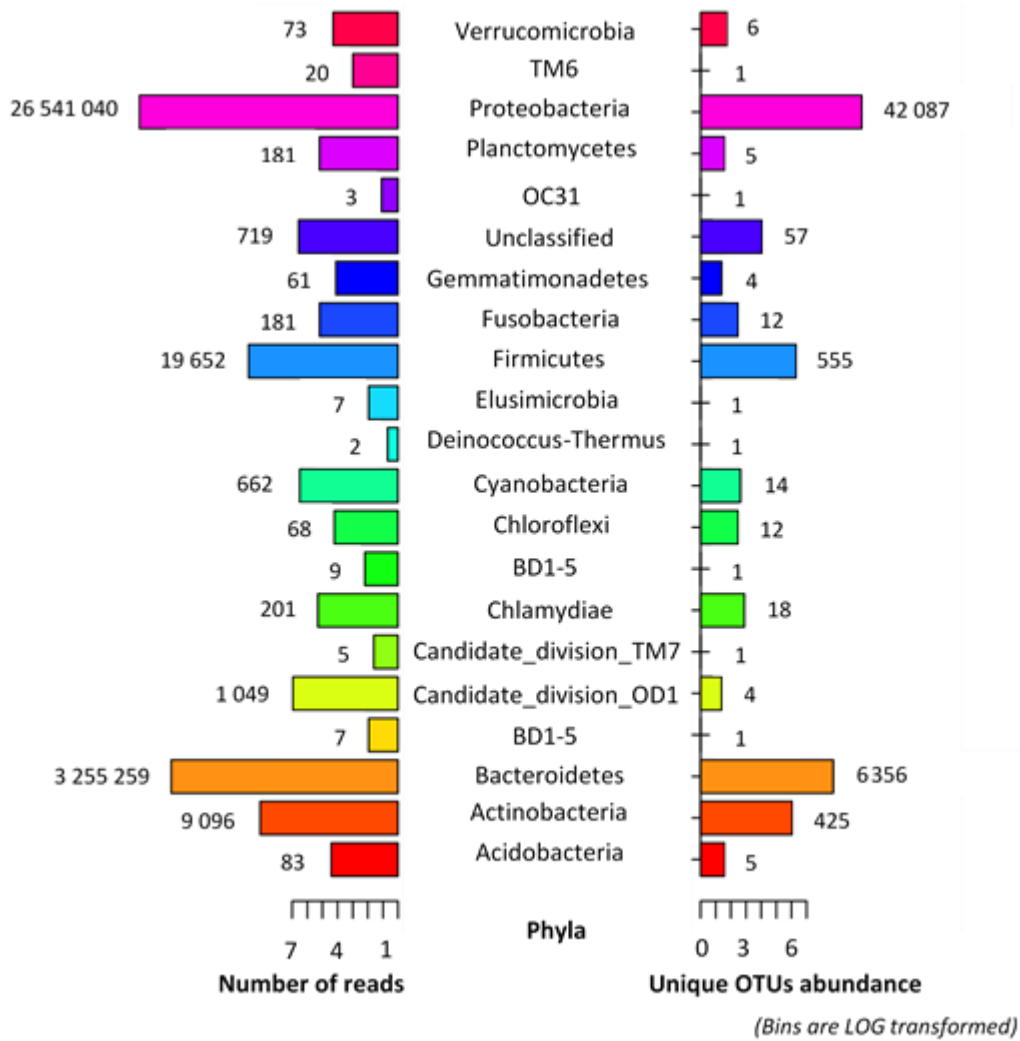

739

740 **Figure S3. Number of reads per unique OTU abundance (at the phylum level).** A comparison of the  
 741 number of individual reads to the number of unique OTUs shows that phyla with high number of reads  
 742 do not result in single OTUs.

743

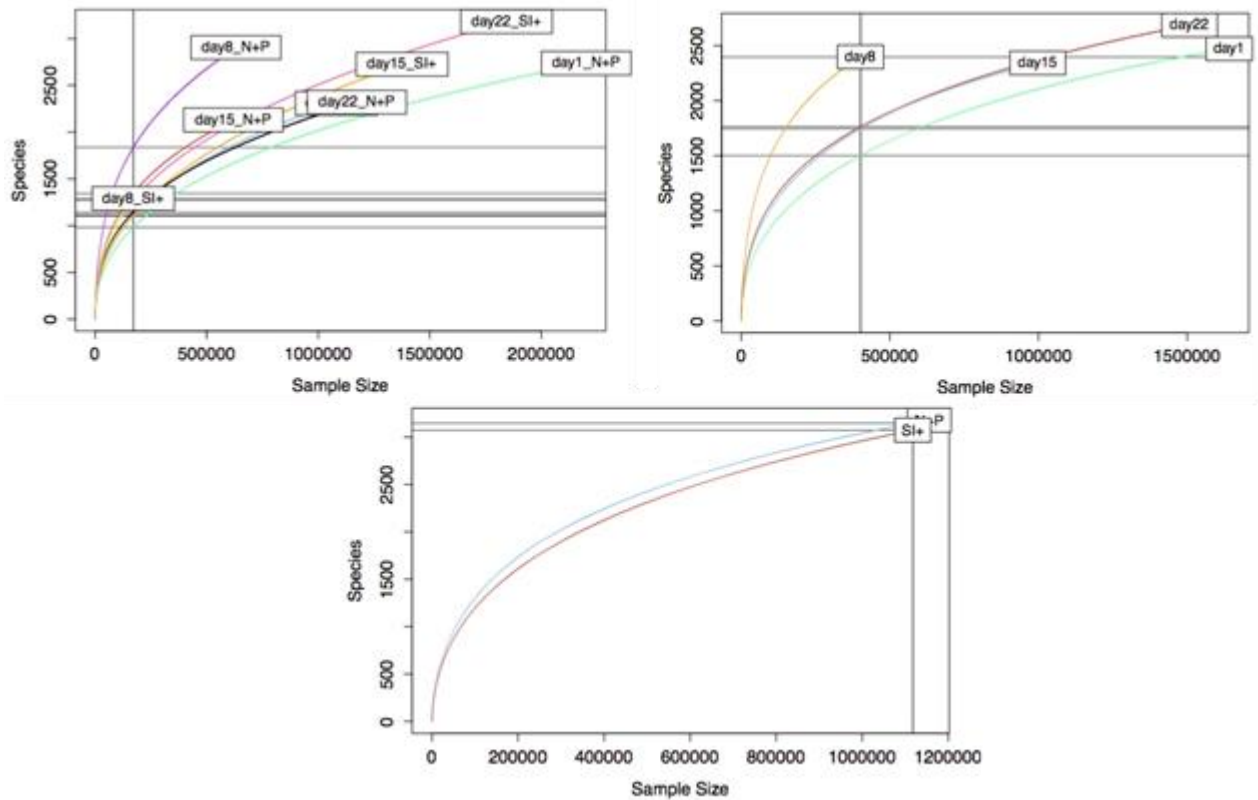

744

745 **Figure S4. Alpha diversity.** Rarefaction curves were used to evaluate the Alpha diversity in the  
746 different media conditions as well as at the different time points. Species richness in both minimal and  
747 complete media was ~3 000. Species richness over time remained between ~2 400 and 2 600, with  
748 reduced species richness (~1 300) on Day 8 (both minimal and complete media) possibly due to  
749 elevated levels of 16S *P. tricornutum* chloroplast reads which had to be omitted. Greatest species  
750 richness (~ 3 000) was shown on Day 22.

751

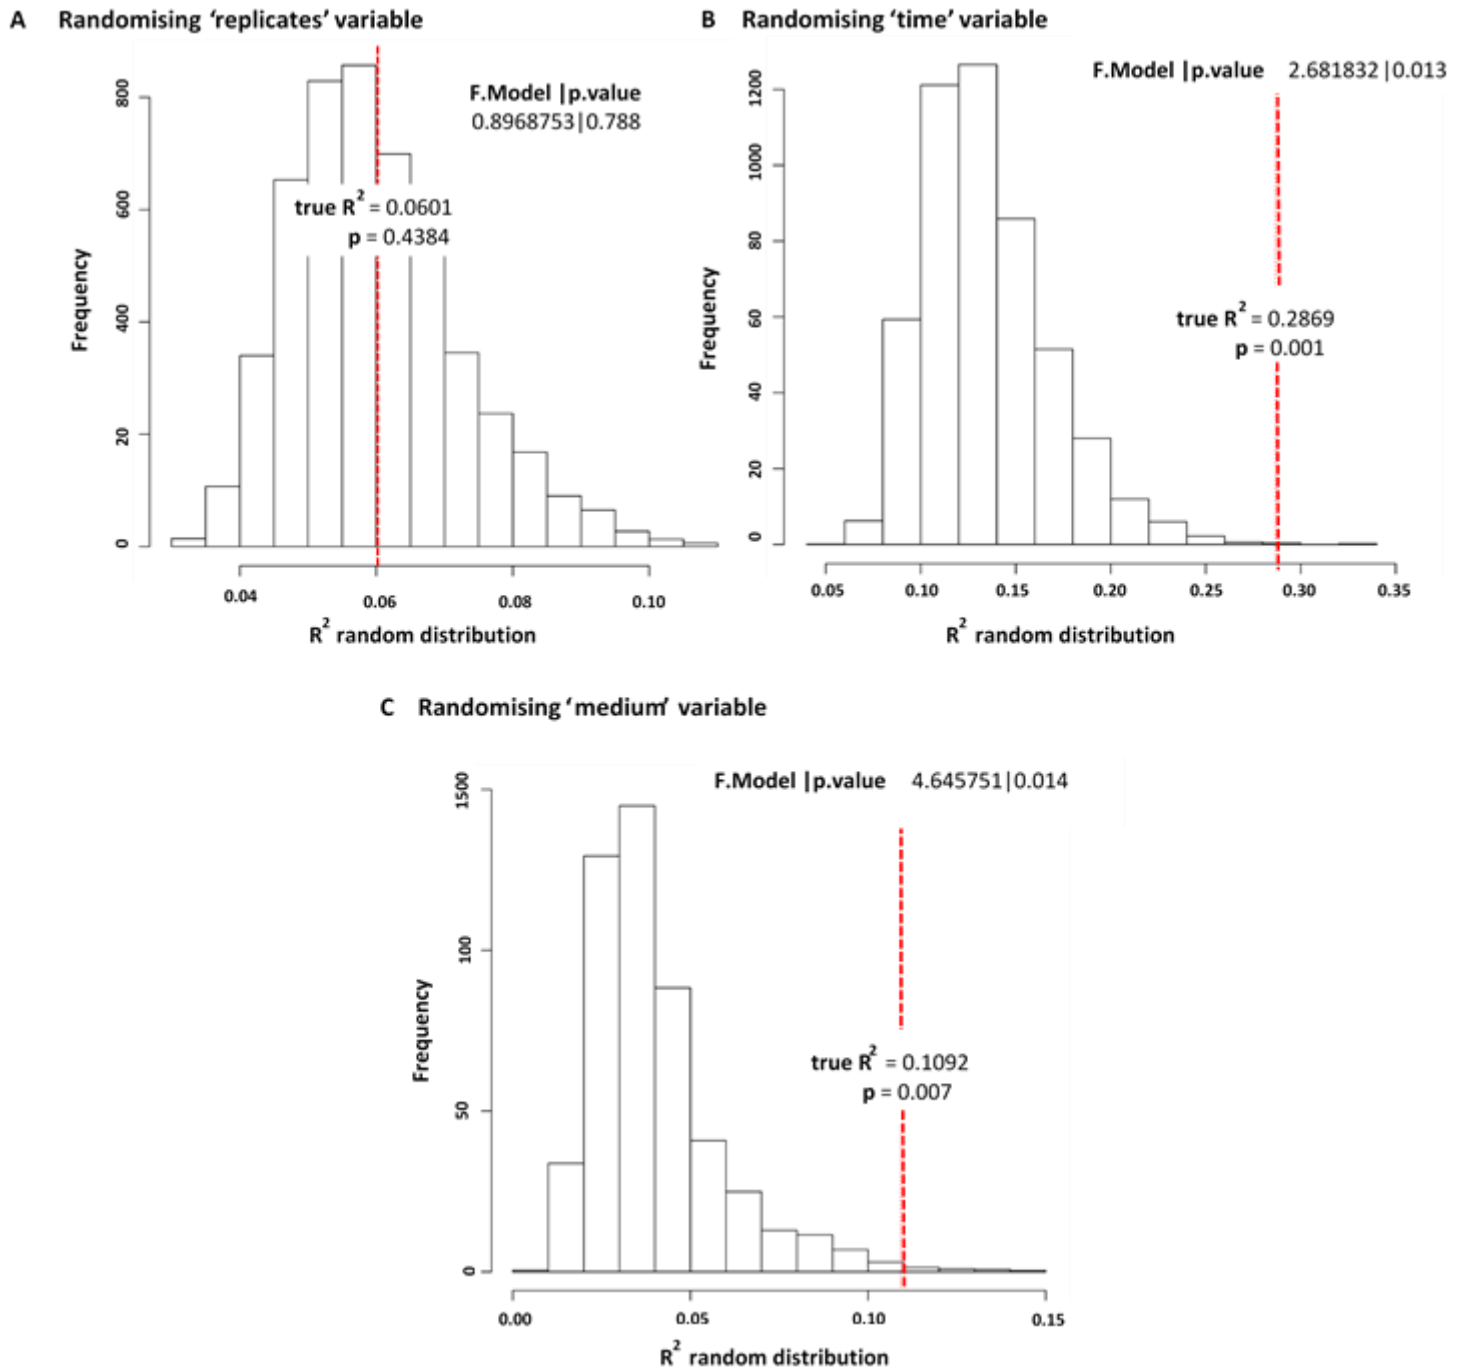

752 **Figure S5. Beta diversity.** A modified version of PermanovaG was used to carry out permutational  
753 multivariate analysis of variance using multiple distance matrices. The distance matrices [24x24] were  
754 previously calculated based on the generalised UniFrac distance (Chen *et al.*, 2012), weighted UniFrac  
755 and unweighted UniFrac (Lozupone and Knight, 2005) distance. The significance for the test was  
756 assessed by 5000 permutations. **A** shows no significant effect between the replicates (p-value of  
757 0.4384). **B** shows a significant effect for the time variable (p-value of 0.001). **C** shows also shows a  
758 significant effect for the medium variable (p-value of 0.007)

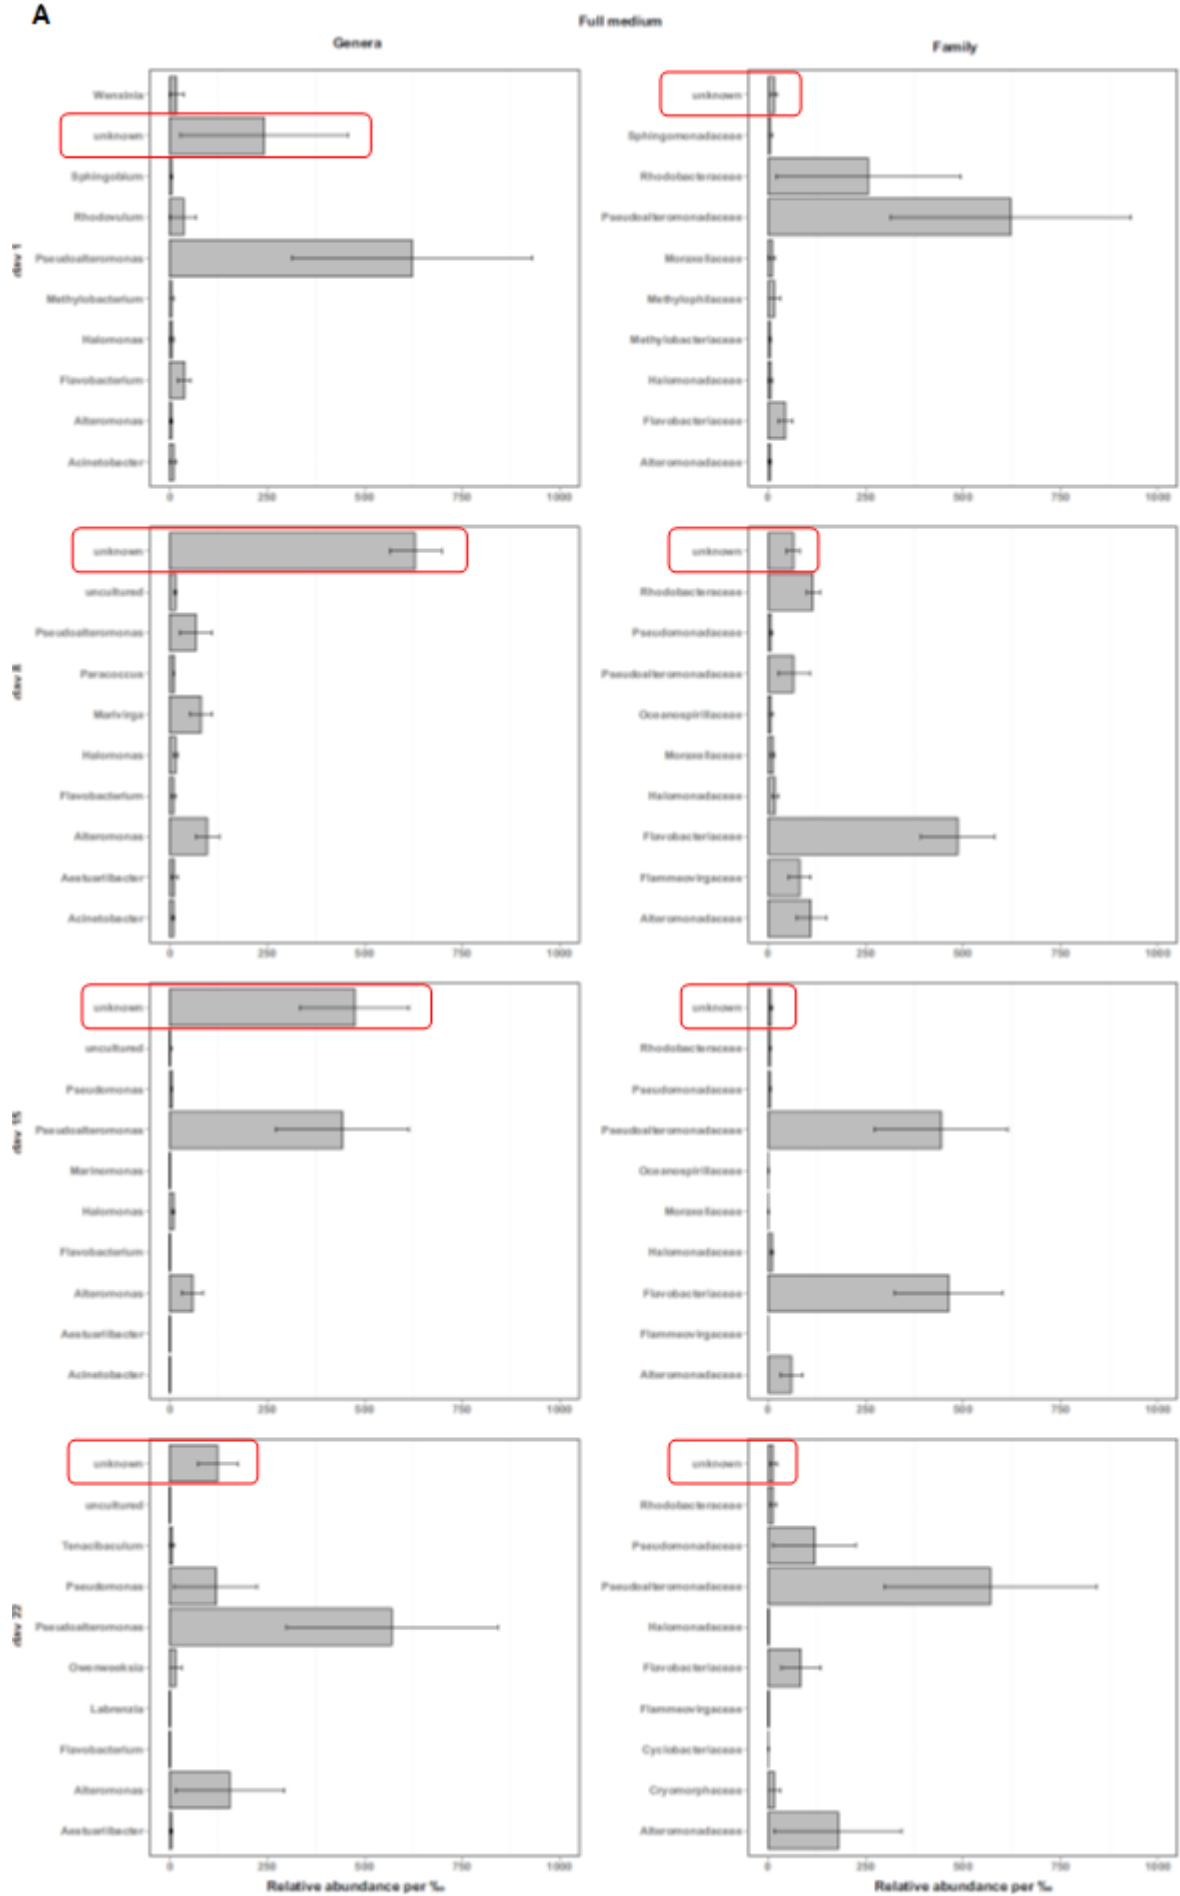

760

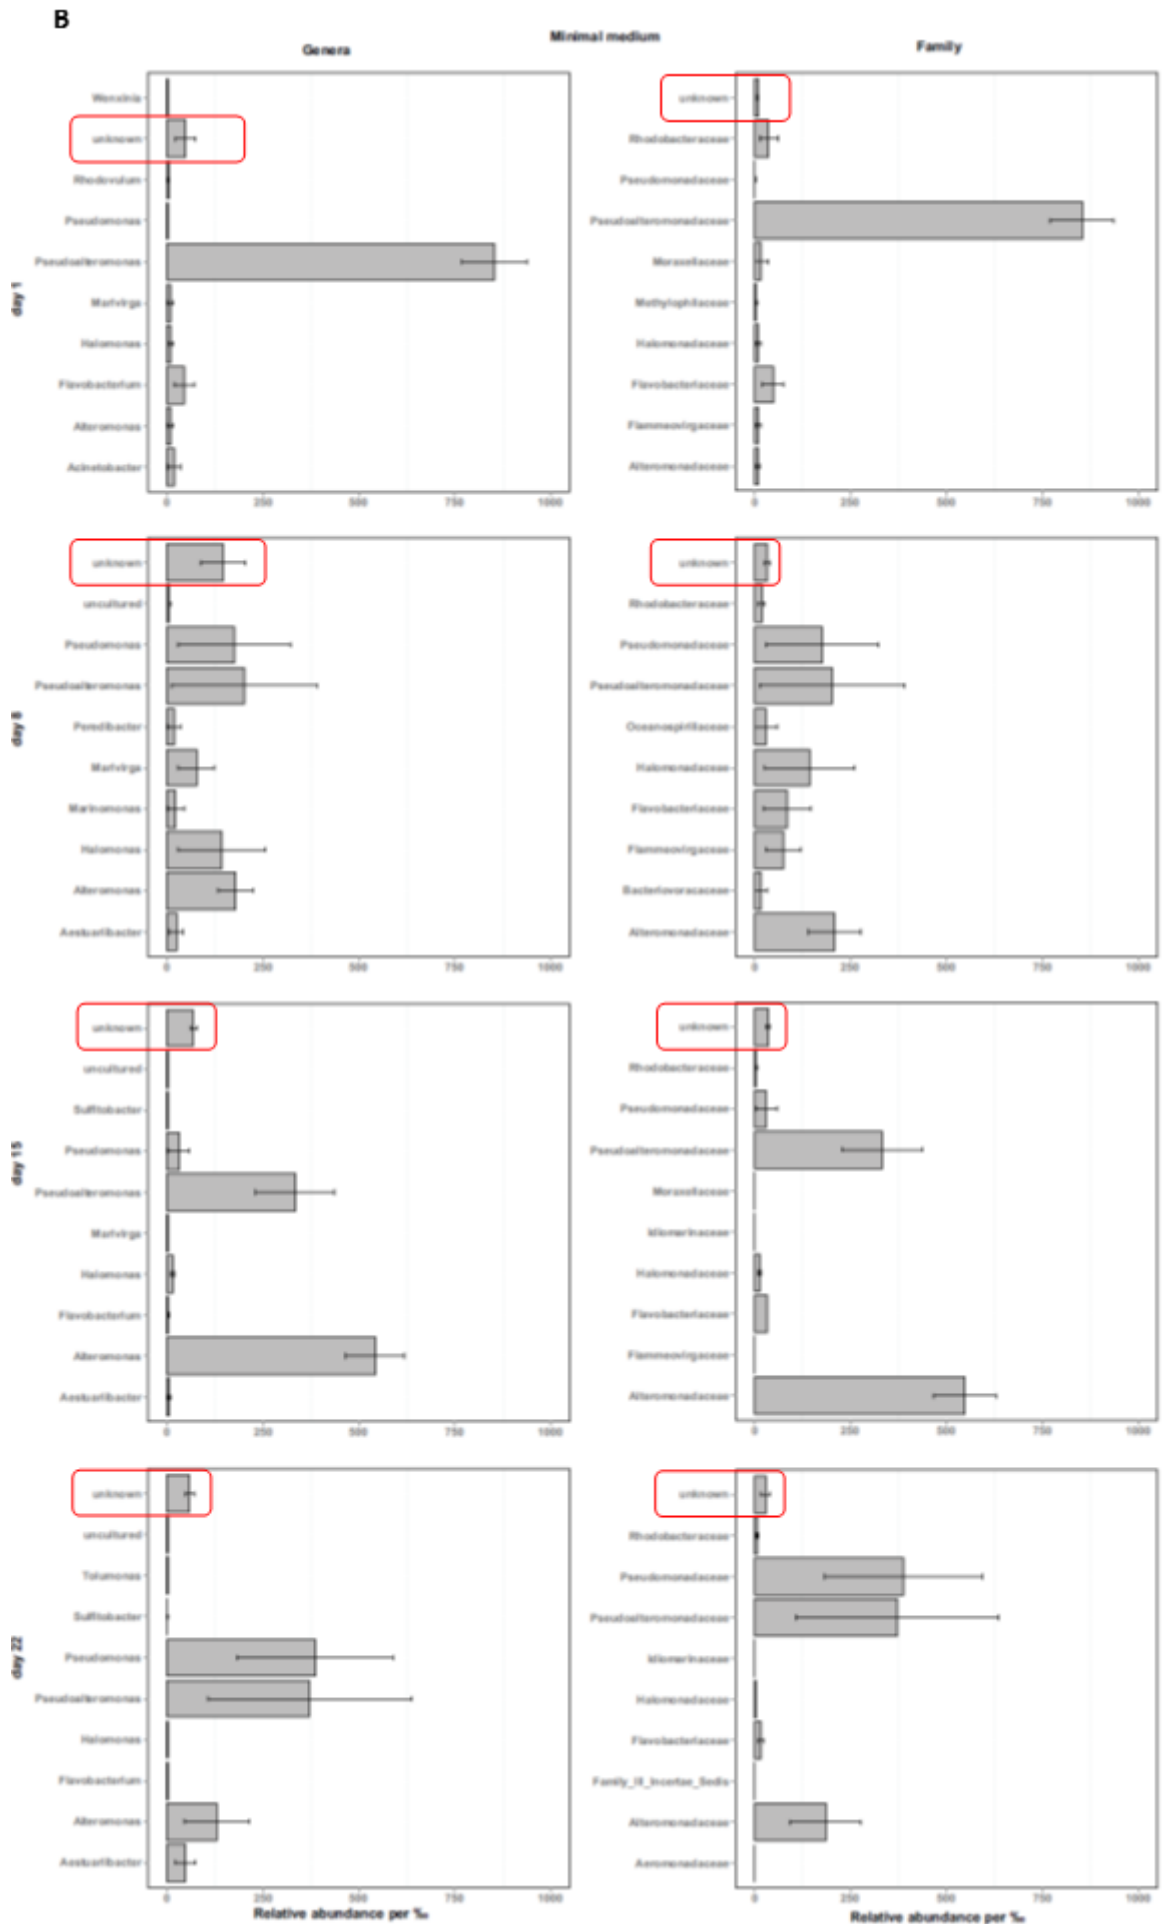

761 **Figure S6. Comparison between bacterial community at genera level and family level. A** in complete  
762 media. **B** in minimal media. We show no dynamical difference within the genera that cannot be  
763 observed at the family level. Encircled in red, there are a greater number of OTUs that could not be  
764 assigned a taxonomy ('unknowns') at the genera level than at the family level. By investigating the  
765 bacterial community dynamics at the family level, we also include taxonomical information that is  
766 unavailable at the genus level.

767

768

**Table S1. 16S V6 rRNA primer sequences.** 'Max' is the complete media. 'Min' is the minimal media. 'A', 'B', and 'C' are the three replicates.

| Description  | Barcode Name  | Adaptor A Sequence             | Barcode Sequence | Forward V6 Primer Sequence | Reverse V6 Primer Sequence |
|--------------|---------------|--------------------------------|------------------|----------------------------|----------------------------|
| Day 1_Max_A  | IonXpress_071 | CCATCTCATCCCTGCGTGTCTCCGACTCAG | TGAGGCTCCGAC     | MWACGCGARGAACCTTACC        | CGACARCCATGCANCACTT        |
| Day 1_Max_B  | IonXpress_072 | CCATCTCATCCCTGCGTGTCTCCGACTCAG | CGAAGGCCACAC     | MWACGCGARGAACCTTACC        | CGACARCCATGCANCACTT        |
| Day 1_Max_C  | IonXpress_073 | CCATCTCATCCCTGCGTGTCTCCGACTCAG | TCTGCCTGTC       | MWACGCGARGAACCTTACC        | CGACARCCATGCANCACTT        |
| Day 1_Min_A  | IonXpress_074 | CCATCTCATCCCTGCGTGTCTCCGACTCAG | CGATCGGTTT       | MWACGCGARGAACCTTACC        | CGACARCCATGCANCACTT        |
| Day 1_Min_B  | IonXpress_075 | CCATCTCATCCCTGCGTGTCTCCGACTCAG | TCAGGAATAC       | MWACGCGARGAACCTTACC        | CGACARCCATGCANCACTT        |
| Day 1_Min_C  | IonXpress_076 | CCATCTCATCCCTGCGTGTCTCCGACTCAG | CGGAAGAACCCTC    | MWACGCGARGAACCTTACC        | CGACARCCATGCANCACTT        |
| Day 8_Max_A  | IonXpress_077 | CCATCTCATCCCTGCGTGTCTCCGACTCAG | CGAAGCGATTTC     | MWACGCGARGAACCTTACC        | CGACARCCATGCANCACTT        |
| Day 8_Max_B  | IonXpress_078 | CCATCTCATCCCTGCGTGTCTCCGACTCAG | CAGCCAATTCTC     | MWACGCGARGAACCTTACC        | CGACARCCATGCANCACTT        |
| Day 8_Max_C  | IonXpress_079 | CCATCTCATCCCTGCGTGTCTCCGACTCAG | CCTGGTTGTC       | MWACGCGARGAACCTTACC        | CGACARCCATGCANCACTT        |
| Day 8_Min_A  | IonXpress_080 | CCATCTCATCCCTGCGTGTCTCCGACTCAG | TCGAAGGCAGGC     | MWACGCGARGAACCTTACC        | CGACARCCATGCANCACTT        |
| Day 8_Min_B  | IonXpress_081 | CCATCTCATCCCTGCGTGTCTCCGACTCAG | CCTGCCATTGCG     | MWACGCGARGAACCTTACC        | CGACARCCATGCANCACTT        |
| Day 8_Min_C  | IonXpress_082 | CCATCTCATCCCTGCGTGTCTCCGACTCAG | TTGGCATCTC       | MWACGCGARGAACCTTACC        | CGACARCCATGCANCACTT        |
| Day 15_Max_A | IonXpress_083 | CCATCTCATCCCTGCGTGTCTCCGACTCAG | CTAGGACATTTC     | MWACGCGARGAACCTTACC        | CGACARCCATGCANCACTT        |
| Day 15_Max_B | IonXpress_084 | CCATCTCATCCCTGCGTGTCTCCGACTCAG | CTTCCATAAC       | MWACGCGARGAACCTTACC        | CGACARCCATGCANCACTT        |
| Day 15_Max_C | IonXpress_085 | CCATCTCATCCCTGCGTGTCTCCGACTCAG | CCAGCCTCAAC      | MWACGCGARGAACCTTACC        | CGACARCCATGCANCACTT        |
| Day 15_Min_A | IonXpress_086 | CCATCTCATCCCTGCGTGTCTCCGACTCAG | CTTGGTTATTTC     | MWACGCGARGAACCTTACC        | CGACARCCATGCANCACTT        |
| Day 15_Min_B | IonXpress_087 | CCATCTCATCCCTGCGTGTCTCCGACTCAG | TTGGCTGGAC       | MWACGCGARGAACCTTACC        | CGACARCCATGCANCACTT        |
| Day 15_Min_C | IonXpress_088 | CCATCTCATCCCTGCGTGTCTCCGACTCAG | CCGAACACTTC      | MWACGCGARGAACCTTACC        | CGACARCCATGCANCACTT        |
| Day 22_Max_A | IonXpress_090 | CCATCTCATCCCTGCGTGTCTCCGACTCAG | CTAACCCAGGC      | MWACGCGARGAACCTTACC        | CGACARCCATGCANCACTT        |
| Day 22_Max_B | IonXpress_091 | CCATCTCATCCCTGCGTGTCTCCGACTCAG | CGGAAGGATGC      | MWACGCGARGAACCTTACC        | CGACARCCATGCANCACTT        |
| Day 22_Max_C | IonXpress_092 | CCATCTCATCCCTGCGTGTCTCCGACTCAG | CTAGGAACCCGC     | MWACGCGARGAACCTTACC        | CGACARCCATGCANCACTT        |
| Day 22_Min_A | IonXpress_093 | CCATCTCATCCCTGCGTGTCTCCGACTCAG | CTTGTCCAATC      | MWACGCGARGAACCTTACC        | CGACARCCATGCANCACTT        |
| Day 22_Min_B | IonXpress_094 | CCATCTCATCCCTGCGTGTCTCCGACTCAG | TCCGACAAAGC      | MWACGCGARGAACCTTACC        | CGACARCCATGCANCACTT        |
| Day 22_Min_C | IonXpress_095 | CCATCTCATCCCTGCGTGTCTCCGACTCAG | CGGACAGATC       | MWACGCGARGAACCTTACC        | CGACARCCATGCANCACTT        |

769 **Table S2. Generalised UniFrac distances of bacterial communities in complete and minimal media**  
 770 **over time.** Generalised UniFrac distance contains an extra parameter  $\alpha$  controlling the weight on  
 771 abundant lineages so the distance is not dominated by highly abundant lineages.  $\alpha = 0.5$  has overall  
 772 the best power.

|        |          | DAY 1     |           | DAY 8     |           | DAY 15    |           | DAY 22    |           |
|--------|----------|-----------|-----------|-----------|-----------|-----------|-----------|-----------|-----------|
|        |          | Minimal   | Complete  | Minimal   | Complete  | Minimal   | Complete  | Minimal   | Complete  |
| DAY 1  | Minimal  | 0         | 0.5158104 | 0.7195151 | 0.8637909 | 0.6668939 | 0.7504169 | 0.6655156 | 0.6608732 |
|        | Complete | 0.5158104 | 0         | 0.7020723 | 0.7203046 | 0.7176411 | 0.7125498 | 0.7019796 | 0.6733559 |
| DAY 8  | Minimal  | 0.7195151 | 0.7020723 | 0         | 0.6641379 | 0.5844515 | 0.6637369 | 0.5905962 | 0.497263  |
|        | Complete | 0.8637909 | 0.7203046 | 0.6641379 | 0         | 0.8558383 | 0.5896856 | 0.8340209 | 0.7723285 |
| DAY 15 | Minimal  | 0.6668939 | 0.7176411 | 0.5844515 | 0.8558383 | 0         | 0.6605545 | 0.4569922 | 0.5042935 |
|        | Complete | 0.7504169 | 0.7125498 | 0.6637369 | 0.5896856 | 0.6605545 | 0         | 0.630498  | 0.5720828 |
| DAY 22 | Minimal  | 0.6655156 | 0.7019796 | 0.5905962 | 0.8340209 | 0.4569922 | 0.630498  | 0         | 0.4597439 |
|        | Complete | 0.6608732 | 0.6733559 | 0.497263  | 0.7723285 | 0.5042935 | 0.5720828 | 0.4597439 | 0         |

773

774

775

776

## 777 **References for Supplementary Figures**

778 Chen, J., Bittinger, K., Charlson, E.S., Hoffmann, C., Lewis, J., Wu, G.D., et al. (2012) Associating  
 779 microbiome composition with environmental covariates using generalized UniFrac distances.  
 780 *Bioinformatics* **28**: 2106–2113.

781 Lozupone, C. and Knight, R. (2005) UniFrac : a New Phylogenetic Method for Comparing Microbial  
 782 Communities UniFrac : a New Phylogenetic Method for Comparing Microbial Communities. *Appl.*  
 783 *Environ. Microbiol.* **71**: 8228–8235.

784 Quast, C., Pruesse, E., Yilmaz, P., Gerken, J., Schweer, T., Yarza, P., et al. (2013) The SILVA ribosomal  
 785 RNA gene database project: improved data processing and web-based tools. *Nucleic Acids Res.*  
 786 **41**: D590–6.
